1 Sensitive detection of DNA contamination in tumor samples via microhaplotypes

2

3 Brett Whitty and John F. Thompson<sup>#1\*</sup>

4 Research and Development, PGDx, 2809 Boston Street, Baltimore, MD 21224

5

6 <sup>#1</sup>Current address: Homology Medicines Inc., 1 Patriots Park, Bedford, MA 01730

7 \*Corresponding Author: [Thompson.john.f@gmail.com](mailto:Thompson.john.f@gmail.com)

8

## 9 **Abstract**

10 Low levels of sample contamination with other human DNAs can have disastrous effects on the  
11 accurate identification of somatic variation in tumor samples. Detection of sample  
12 contamination in DNA is often based on low frequency variants that indicate if more than a  
13 single source of DNA is present. This strategy works with standard DNA samples but can be  
14 problematic in solid tumor FFPE samples because there are often huge variations in allele  
15 frequency (AF) due to copy number changes arising from gains and losses across the genome.  
16 The variable AFs make detection of contamination challenging. To avoid this, we counted  
17 microhaplotypes to assess sample contamination. Microhaplotypes are sets of variants on the  
18 same sequencing read that can be unambiguously phased. Instead of measuring AF, the  
19 number of microhaplotypes is determined. Contamination detection becomes based on  
20 fundamental genomic properties, linkage disequilibrium (LD) and the diploid nature of human  
21 DNA, rather than variant frequencies. We optimized microhaplotype panel content and  
22 selected 164 SNV sets located in regions already being sequenced within a cancer panel. Thus,  
23 contamination detection uses existing sequence data. LD data from the 1000 Genomes Project  
24 is used to make the panel ancestry agnostic, providing the same sensitivity for contamination  
25 detection with samples from individuals of African, East Asian, and European ancestry.  
26 Detection of 1% contamination with no matching normal sample is possible. The methods  
27 described here can also be extended to other DNA mixtures such as forensic and non-invasive  
28 prenatal testing samples where DNA mixes can be similarly detected. The microhaplotype  
29 method allows sensitive detection of DNA contamination in FFPE tumor and other samples  
30 when deep coverage with Illumina or other high accuracy NGS is used.

31

## 32 **Introduction**

33 In many applications, DNA contamination is not a significant issue because small amounts of  
34 extraneous DNA do not affect the experimental outcome. When examining DNA from a single  
35 species, it is easy to filter out sequences from other species but within-species contamination is  
36 more challenging. When analyzing germ-line variants, a substantial fraction of human DNA from  
37 other sources is required to affect variant calls because non-reference calls will be  
38 approximately 0%, 50% or 100%. For example, concordance between variant calls made by SNP  
39 chips versus pure NGS for high depth samples with 5% contamination fell only from 99.7% to  
40 99.2% (1). However, even with low-level DNA contamination, there can be a significant impact  
41 on some applications like detecting low frequency somatic variants in tumor DNA samples or  
42 deconvoluting complex mixtures in forensic samples. Clinical diagnostic samples are presumed  
43 to be pure when they are tested, but there is always a concern that unexpected contamination  
44 could affect results and escape standard detection methods. Knowledge of whether a sample is  
45 contaminated with another and, if so, the extent of that contamination, is critical for assessing  
46 whether somatic variant calls can be trusted.

47 Contamination detection is often carried out by measuring variable lengths of short tandem  
48 repeats (STRs) or by genotyping/sequencing single-nucleotide variants (SNVs). When unusual  
49 frequencies are observed, the degree of contamination is estimated by quantitating the  
50 frequency of the extra variants (2-5). However, accurate estimation becomes difficult at low  
51 variant frequency because the true signal can be obscured by the competing noise arising from

52 technical issues like STR stutter or genotyping/sequencing errors. This is especially problematic  
53 with analog measurement systems that are often used with STR, genotyping, and classical  
54 sequencing methods. In contrast, next-generation sequencing (NGS) methods produce a digital  
55 signal, allowing greater sensitivity and accuracy at low contamination levels.

56 In addition to the method described here, there are informatic methods that make use of  
57 different types of NGS read data to model whether contamination is likely. These methods are  
58 often tied to particular data and/or sample types so may not extrapolate well to other systems  
59 like clinical test samples. For example, ContEst (2) is highly sensitive but uses both whole  
60 genome and microarray data or matched normal samples. This has recently been replaced by  
61 CalculateContamination that relaxes copy number and matched sample requirements.

62 Verifybamid (6) can be used with just NGS data, but its accuracy is dependent on large numbers  
63 of SNVs and knowledge of population SNV frequencies and cannot be used with DNA with large  
64 copy number changes. It is also computationally intensive; but, VerifyBamID2 was recently  
65 developed to address these issues (7). Conpair (8) is much less computationally intensive but  
66 still requires large numbers of SNVs as well as tumor-normal pairs. It can be used with exomes  
67 or large panels but not smaller panels. Sensitive detection of circulating transplant DNA has  
68 been achieved with genome-wide SNVs (9) but this method is hampered when there is copy  
69 number variation as is often found in tumor samples. Sehn et al. (10) have taken advantage of  
70 closely spaced SNVs that are not in perfect LD, known as microhaplotypes (MH), to assess DNA  
71 contamination to a level of 5%. Microhaplotypes can be defined as multiple variants on the  
72 same sequence read such that the phasing of the variants is known and the haplotype can be  
73 unambiguously determined.

74 Testing clinical tumor samples for somatic variation is complicated by the presence of large  
75 regions of the tumor genome that may be highly amplified or deleted. When diagnostic  
76 samples have large fractions of the genome with altered copy number, the allelic frequencies  
77 (AFs) of SNVs can vary substantially and change from the typical 50-50 AF to much more  
78 extreme values. These altered allele ratios can overlap the range of AFs for what is typically  
79 seen with contamination and thus a sample that is 100% pure can mistakenly appear to be  
80 significantly contaminated if only AF is examined. To avoid these problems, we have optimized  
81 an MH counting method that is independent of genotype AF for determining contamination  
82 status with tumor DNA and can be carried out with no matching normal sample.

83 For individuals with a normal set of chromosomes, each autosomal region of any size has two  
84 sets of alleles. Those alleles may be the same (homozygous) or different (heterozygous); but,  
85 under normal circumstances with a few specific exceptions, there should never be more than  
86 two haplotypes in a genomic region in any individual. When DNA from two individuals is mixed,  
87 accidentally or intentionally, there is a possibility for 1-4 MHs in each region. MHs have been  
88 used for forensic purposes to detect contamination and identify individuals (11-17), to detect  
89 transplant DNA in a host background and contamination in tumor samples (18), and to  
90 determine ancestry (19-23). Use of MHs for routine detection and estimation of contamination  
91 in clinical FFPE tumor samples is a powerful application of these methods.

92

## 93 **Materials and Methods**

## 94 Sequencing Samples

95 849 de-identified lung tumor samples and DNA from lung tumors were obtained from several  
96 commercial and academic providers. These included BioIVT, Conversant Bio, Cureline, Duke,  
97 Folio Bio, Fundacio Institute, Indivumed, iSpecimen, NCI, and Proteogenex. Samples were  
98 received either as FFPE material or extracted DNA. If necessary, extraction of DNA from FFPE  
99 specimens was carried out using standard kits. DNA was prepared for sequencing using  
100 hybridization capture with panels directed primarily at exons in >500 genes implicated in cancer  
101 (see <https://www.personalgenome.com/assets/resources/elio-tissue-complete-brochure.pdf>  
102 for a listing of genes). For some genes, intronic and promoter DNA was also targeted. DNA was  
103 sequenced using an Illumina NextSeq500. The PGDx elio™ tissue complete assay was used for  
104 sample preparation and analysis (24, 25). 15 samples were sequenced on standard runs. For a  
105 run to pass, at total of >90 GB sequence with >75% of reads at Q30 or above was required. For  
106 an individual sample to pass, >90% of targeted regions were required to have >100x median  
107 coverage. Individual reads were analyzed as described (26) with a base quality filter applied to  
108 only include bases with a reported Phred quality score >30. Because erroneous reads could  
109 artificially inflate the number of 3<sup>rd</sup>/4<sup>th</sup> MHs, MH calculations included 3<sup>rd</sup> MHs only if they  
110 surpassed a minimum fraction of total calls. We usually set this threshold at >0.2% based on the  
111 typical error rate for Illumina NGS (~0.1%). Higher values can be used to reduce noise but that is  
112 accompanied by a loss in sensitivity.

113 Each accepted read covering the positions of all SNVs for each MH set was binned into the  
114 appropriate haplotype and counted using Samtools mpileup. After read alignment, mpileup was

115 applied to the first region, the second region, and, if present, the third region. mpileup reads  
116 are then combined and separated by basecalls. Each resultant set of base calls (MHs) is then  
117 counted to determine MH frequency.

## 118 ***In silico* read mixing**

119 Artificially contaminated samples were made by *in silico* mixing of reads at defined  
120 contamination levels. Contamination levels of x% were generated by combining randomly  
121 selected 100-x% reads from the sample with x% random reads from the contaminant and  
122 running the resultant reads through the standard analysis pipeline. It was found that the same  
123 results were achieved if only the reads mapping to the MH regions being examined were  
124 included in the mixing. These analyses involved much less data so ran on the pipeline much  
125 faster. Thus, later experiments used only the truncated data set to speed analysis and allow  
126 more conditions to be tested.

127

## 128 **Results**

### 129 **DNA samples and MAF-based contamination detection**

130 849 FFPE tumor DNA samples were examined, but most studies focused on the 51 samples  
131 listed in Table 1. All samples that passed QC were amenable to contamination testing, but the  
132 number of samples analyzed for mixing had to be limited due to the high compute  
133 requirements for analyzing the many *in silico* mixtures. The mixing samples were chosen based  
134 on being the most apparently pure and equally representing three of the five geographic

135 ancestral groups described by the 1000 genomes project (African, East Asian, European). DNA  
136 quality was highly variable which primarily impacted mixing studies when two samples of much  
137 different quality were mixed.

138 Prior to using MHs, we had assessed DNA contamination based on finding low level germline  
139 SNVs that were assumed to come from contaminating DNA. However, FFPE tumor samples can  
140 have high levels of copy number variation that can have a serious impact on germline SNV AFs  
141 as shown in Fig 1. For 10 FFPE tumor samples, all variants in the VCF with a dbSNP number were  
142 examined. Having an assigned dbSNP number was used as a surrogate for variation that is most  
143 likely real since it has been observed previously. Variants were sorted by MAF into 10% bins.  
144 Most samples had the expected distribution where >80% of the variants had 0-10% MAF with  
145 this low-level variation arising from sequencing errors, FFPE artifacts or somatic variants. In  
146 addition, there are also many with 40-50% MAF arising from heterozygous germline variants.  
147 However, three samples had much more widely distributed MAFs including one sample  
148 (AATF748T) where >20% of the variants had MAFs between 20 and 30%. These are germline  
149 variants as confirmed by matching normal DNA samples that were also sequenced for these  
150 samples. When we used a method for detecting DNA contamination based on low frequency  
151 germline variants, these samples were discarded based on supposed high contamination levels  
152 when, in fact, they are close to 100% pure based on MH analysis. The “contamination” signal is  
153 actually copy number variation.

154 **Figure 1 MAF for 10 FFPE tumor samples**



155 All variants with dbSNP identifiers were binned by AF for the less common allele. Bins were 10%  
156 ranges. These samples had 348-561 such variants in the VCF with the vast majority being  
157 germline as confirmed by matching normal samples. The percentage of variants in each bin is  
158 shown. Additional information about these samples is in Table 1.

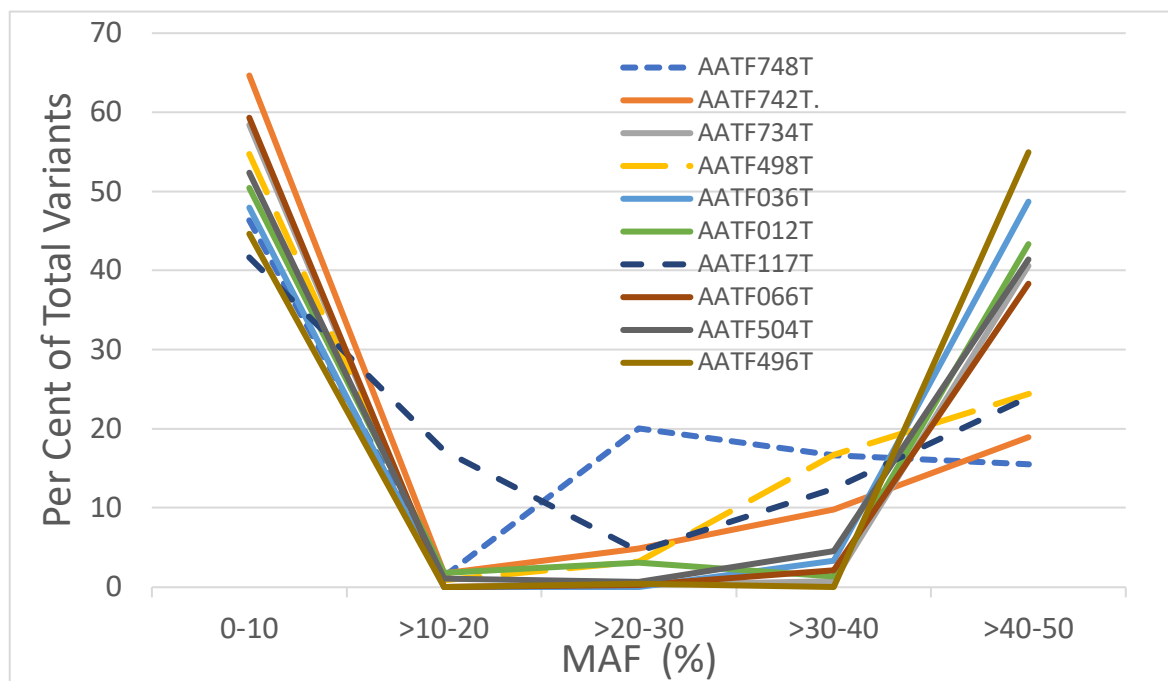

159

## 160 Choice of variant sets for microhaplotype analysis

161 There are many MHs that have been characterized in the literature, and their usefulness for  
162 distinguishing individuals and ancestries is well documented (13, 20, 23). However, most of the  
163 well-characterized MHs are not in regions chosen for commercial cancer panel sequencing. In  
164 addition, the criteria for selecting MHs for discriminating individuals and ancestry are not the  
165 same as for detecting contamination where the goal is not distinguishing individuals but  
166 maximizing the number of MHs with potentially >2 versions. Since high depth sequencing is  
167 required for sensitive contamination detection using this approach, regions already targeted for

168 analysis were examined so that additional, non-productive sequencing in MH regions outside of  
169 the pre-existing panel could be avoided. For gene panel sequencing, this means that literature  
170 MH data is of limited value. Each novel MH set we chose was tested for behavior across  
171 samples and ancestries. For these experiments, we have used a >500 gene, 2.23 Mb cancer  
172 panel directed against FFPE tumor DNA  
173 (<https://www.personalgenome.com/assets/resources/elio-tissue-complete-brochure.pdf>), but  
174 any pre-existing panel can be examined in a similar manner to identify useful SNV sets. This  
175 cancer panel included regions outside of exons and these regions were also inspected for  
176 potentially informative SNV sets.

177 Candidate MH sets were chosen manually, but these steps can be automated if many or larger  
178 panels are desired. The criteria for inclusion in the initial set of variants to be tested included  
179 maximizing the frequency of 3<sup>rd</sup> MHs while minimizing the likelihood of sequencing errors in  
180 those variants. This was achieved by avoiding regions with higher inherent sequencing error  
181 rates such as insertions, deletions, and variants within homopolymeric regions and other  
182 repetitive elements. The regions targeted for cancer panel sequencing were examined in the  
183 gnomAD database ([gnomad.broadinstitute.org/](http://gnomad.broadinstitute.org/); 27) for multiple SNVs within 200 bp of the  
184 targeted regions and of each other and with 3-97% AF. The desired final AF (5-95%) was higher,  
185 but we wanted to ensure that MHs from populations underrepresented in gnomAD could still  
186 be identified. The gnomAD database, at the time initially queried, had a higher proportion of  
187 individuals of European ancestry (~60%) than individuals with other geographic ancestries.  
188 Because of this, variation in European ancestry individuals had a larger impact on the initial  
189 choice of SNVs than variation in other ancestries. Thus, there is a possibility that samples from

190 different ancestral backgrounds could respond differently when not filtered based on ancestry.  
191 Once the candidate MH sets were identified, they were balanced for ancestry so that detection  
192 of contamination in all groups would behave similarly.

193 Variants not in a segmental duplication or a low confidence region as defined by gnomAD were  
194 examined for LD in the 1000 Genomes Project samples ([ldlink.nci.nih.gov/?tab=ldhap](http://ldlink.nci.nih.gov/?tab=ldhap); 28). This  
195 site provides data on the frequency of each haplotype in each ancestry. Pairs and triplets of  
196 SNVs with at least three haplotypes and the 3<sup>rd</sup> and greater haplotypes having a total frequency  
197 of >5% in any individual ancestral grouping in the 1000 genomes project were advanced for  
198 evaluation in real samples sequenced as described. SNV sets with median coverage >250x for all  
199 relevant variants on individual reads were examined further. SNV sets with high frequency  
200 3<sup>rd</sup>/4<sup>th</sup> MHs in many purportedly pure samples were eliminated because they might produce  
201 high noise relative to signal. With these samples, SNV sets with more than 5 samples with >2  
202 MHs were eliminated (26 of 264 evaluated SNV sets). SNV sets in close physical proximity to  
203 each other in high LD would provide duplicate information. LD was considered too high if the  
204 haplotype frequency was unchanged when the SNVs were combined and examined together.  
205 SNV sets with shorter homopolymers, higher coverage, and fewer 3<sup>rd</sup>/4<sup>th</sup> MHs in pure samples  
206 were included in the panel when high LD alternatives were considered. SNV sets that passed  
207 these initial evaluations are shown in Supplementary Table 1. In addition to the genomic  
208 coordinates and dbSNP identifiers, the frequency of MHs is shown for the five major ancestry  
209 groupings defined by 1000 Genomes as well as the median coverage for the relevant SNVs  
210 across 849 samples, the number of times the SNV set generated more than 2 MHs in “pure”  
211 samples, and the DNA length separating the SNVs.

212 Once these criteria were met, SNV sets were balanced for ancestral frequency. While it would  
213 have been desirable to use all population groupings from 1000 Genomes in this analysis, there  
214 were not enough SNV sets to allow balancing of all five major ancestry groupings so only data  
215 from African, East Asian, and European ancestry were assessed to achieve balanced variation.  
216 SNV sets that adversely affected ancestry balance were eliminated. The balanced panel of 164  
217 SNV sets is shown in Supplementary Table 1. The average frequency of 3<sup>rd</sup>/4<sup>th</sup> MHs was 13.9%  
218 for each of the three balanced ancestries.

219

## 220 **Assessing contamination and estimating levels**

221 In order to determine how best to detect contamination, *in silico* mixing of reads from  
222 individual pure samples was carried out so that the precise level of contamination would be  
223 known and the sensitivity and accuracy of the MH assay could be determined. The initial  
224 samples used for establishing contamination methods need to be as close to 100% pure as  
225 possible for maximizing sensitivity. 51 samples were chosen for *in silico* mixing experiments to  
226 examine this in more detail. Samples with self-declared ancestry were chosen to achieve  
227 ancestral diversity and the fewest number of >2 MH sets. The performance of 51 reportedly  
228 pure samples from individuals of known, self-declared ancestry is shown in Table 1.

229 The self-declared ancestry of samples was confirmed using Principle Component Analysis (PCA)  
230 of the SNV sets based on 1000 Genome MH frequencies. The self-declared and PCA-determined  
231 ancestries of all samples agreed. However, with some samples, the self-declared ancestry was  
232 Asian and the PCA-determined ancestry was South Asian rather than East Asian. For analysis of

233 individuals who listed Asian ancestry, only samples with PCA-confirmed East Asian ancestry  
234 were used in analyses. In addition to diverse ancestral histories, samples were selected for  
235 mixing experiments based on having the fewest SNV sets with >2 MHs.

236 For these samples, the mean number of 3<sup>rd</sup>/4<sup>th</sup> MHs is over 20. Because these samples are  
237 supposed to be pure, the 3<sup>rd</sup>/4<sup>th</sup> MHs are likely often due to artifactual false calls that arise due  
238 to the high coverage depth for many SNV sets or FFPE-induced errors. This is supported by the  
239 mean 3<sup>rd</sup> MH frequency which is only 0.003 for the panel. To minimize the number of artifactual  
240 3<sup>rd</sup> MHs, we set a lower limit of 0.2% for counting 3<sup>rd</sup>/4<sup>th</sup> MHs based on the typical Illumina  
241 error rate of ~0.1%. Using a threshold of >0.2% eliminates over 1/3 of 3<sup>rd</sup> MHs in these pure  
242 samples, most of which are likely to be artifactual. When this threshold is employed, the  
243 median 3<sup>rd</sup> MH frequency increases but remains less than 0.6% for all samples with >20 3<sup>rd</sup>  
244 MHs. The need for a minimum threshold for the number of 3<sup>rd</sup>/4<sup>th</sup> MHs is highlighted by the  
245 three examples from these 51 samples where the median 3<sup>rd</sup> MH frequency is >0.01. All three  
246 have five or fewer 3<sup>rd</sup> MHs, suggesting that outlier artifactual MHs are driving the median  
247 frequency when few real 3<sup>rd</sup> MHs are present. Based on this concern, we instituted a minimum  
248 threshold of 25 SNV sets with >2 MHs with frequency >0.2%. 25 SNV sets with >2 MHs is not  
249 intended to distinguish contaminated from pure samples but rather ensure that the 3<sup>rd</sup> MH  
250 frequency is more reliable. 5 of the 51 pure DNAs in Table 1 have > 25 3<sup>rd</sup>/4<sup>th</sup> MHs (>0.2%  
251 minimum threshold for inclusion as a 3<sup>rd</sup> MH). This threshold should never eliminate a truly  
252 contaminated DNA but is intended only to ensure there are enough SNV sets to establish a  
253 reliable 3<sup>rd</sup> MH median frequency. The low rate of 3<sup>rd</sup>/4<sup>th</sup> MHs across pure samples support the  
254 concept that, at least at the sites analyzed, NGS and FFPE errors occur at a very low rate. All *in*

255 *silico* mixtures tested at the 0.5% contamination level using the samples in Table 1 had more  
256 than 25 MHs. As seen in Fig 2, the average value for the number of 3<sup>rd</sup> MHs among all  
257 ancestries with 1% contamination is >45 with this panel (range 29-69). Thus, this threshold  
258 should not eliminate any samples contaminated at >0.5% and allows the 3<sup>rd</sup> MH frequency  
259 value to be more reliable.

260 Precise levels of read mixing can be generated *in silico* but the functional level of contamination  
261 was found to often differ significantly from the known mixing proportions. This issue was  
262 particularly obvious when samples with divergent DNA qualities were mixed. The longer, higher  
263 quality DNA appeared to have a higher concentration than what had been added to the mix.  
264 This arises because longer reads map better and are more likely to contain all the variants being  
265 examined and thus this DNA appears to be relatively more frequent than the shorter, more  
266 degraded DNA. This is consistent with previous results that showed DNA with reduced  
267 extraction yields tend to be lower quality and more susceptible to contamination (10). To  
268 minimize the impact of this effect, all DNA mixes were examined in a pairwise fashion where  
269 one sample was the primary sample and the second was the contaminant. These roles were  
270 then switched and the results averaged. This allowed an over-contamination with one sample  
271 set to be partially mitigated by the paired under-contamination of the opposite sample set.

272 15 DNA sets from each ancestry were mixed as sample/contaminant pairs with averaged results  
273 shown in Fig 2. As expected, the East Asian fraction of >2 MHs was nearly identical to the  
274 European results. The African American samples that we examined had a higher frequency of  
275 >2 MHs than the other groupings, but nearly identical to the samples that were mixed across  
276 ancestries. This is predicted by 1000 Genomes data. Their subgroupings of African ancestry

277 included seven different sub-populations, only one of which was US-based. When the African  
278 American subgrouping is compared to the other African populations, it has a higher 3<sup>rd</sup>/4<sup>th</sup> MH  
279 frequency (0.155 vs 0.139, Supplementary Table 1). The higher frequency in our population  
280 reflects the fact our African ancestry samples are primarily from African American individuals.

281 **Figure 2 Number of SNV sets with >2 MHs for individual samples**

282 The number of 3<sup>rd</sup> MHs for pairs of individuals of East Asian, African American, and European  
283 ancestry is shown for mixes of 0.1 – 40%. Mixing results from pairs of individuals with different  
284 ancestry is included as “Mixed”, all on a log scale.

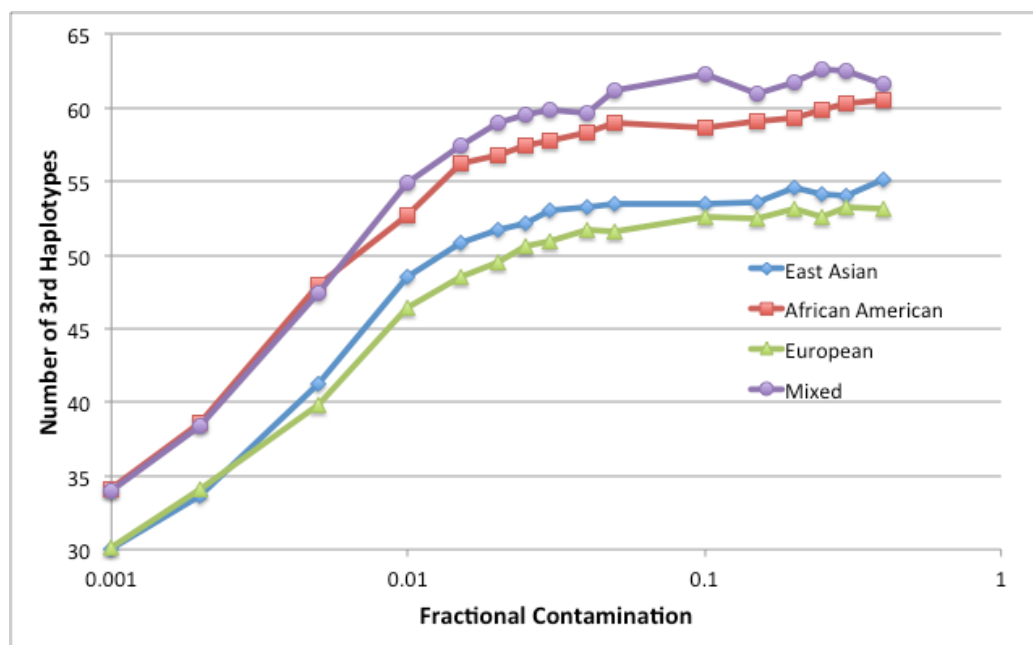

285  
286 Even at the lowest tested contamination level, 0.1%, the mean number of 3<sup>rd</sup>/4<sup>th</sup> MHs is over 30  
287 compared to 13 (range 2-39) for the pure samples without mixing (Table 1). At 1%  
288 contamination, the mean number of 3<sup>rd</sup>/4<sup>th</sup> MHs is over 45 for all groupings with a range for  
289 individual mixes of 29-69. Because a small number of 3<sup>rd</sup>/4<sup>th</sup> MHs can cause a median values to

290 be impacted greatly by outliers, we have set a minimum threshold for the number of 3<sup>rd</sup>/4<sup>th</sup>  
291 MHs before a contamination level is calculated. Based on these data, 25 is set as the minimum  
292 number before a sample is considered potentially contaminated because it is less than all  
293 samples mixed at 1% and high enough to minimize the impact of individual outliers.

294 While the number of 3<sup>rd</sup> MHs is relevant for assessing whether a sample is potentially  
295 contaminated, it is less useful for estimating the level of contamination as it reaches a  
296 maximum around 2% contamination with these coverage levels. In contrast, median 3<sup>rd</sup> MH  
297 frequency changes as a function of contamination level so is more useful in this regard.

298 The *in silico* mixing studies provide an empirical calibration, but it is also useful to understand  
299 the theoretical basis for those findings. As shown in Fig 3, the expected frequency of the  
300 contaminating 3<sup>rd</sup> MH depends on the nature of the starting and incoming genotypes. Some  
301 combinations will generate no 3<sup>rd</sup> MH, others will generate a 3<sup>rd</sup> MH with a frequency half the  
302 level of incoming contaminant, and others will generate a genotype that is the same frequency  
303 as the contaminant. Since most variant combinations will be at the 50% level, examination of  
304 the median value for the 3<sup>rd</sup> MH should yield a value that is half of the true contamination level.

305 **Figure 3 Expected frequencies for 3<sup>rd</sup> MHs based on genotype**

306 A primary sample can be either homozygous for one MH or heterozygous for two versions. For  
307 an incoming contaminating sample with at least one third MH, there are four different  
308 possibilities for each starting primary sample as shown. Most of these generate a  
309 contamination signal at half the frequency of the starting DNA. When the four alleles are all  
310 different, the 3<sup>rd</sup> MH comes in at half the frequency while the combined 3<sup>rd</sup>/4<sup>th</sup> frequency is 1x.



311 If there is a 4<sup>th</sup> MH, it should have the same frequency as the 3<sup>rd</sup> MH as long as there are no  
312 technical artifacts.

| Primary Sample |   | Contaminant (X) | Rate of 3 <sup>rd</sup> MH Accumulation |
|----------------|---|-----------------|-----------------------------------------|
| MH1/MH1        | + | MH1/MH3         | → no 3 <sup>rd</sup> MH                 |
|                |   | MH2/MH3         | → 0.5 X                                 |
|                |   | MH3/MH3         | → no 3 <sup>rd</sup> MH                 |
|                |   | MH4/MH3         | → 0.5 X                                 |
| MH1/MH2        | + | MH1/MH3         | → 0.5 X                                 |
|                |   | MH2/MH3         | → 0.5 X                                 |
|                |   | MH3/MH3         | → 1X                                    |
|                |   | MH4/MH3         | → 0.5X                                  |

313

#### 314 **Figure 4\_ Contamination Detection as a function of ancestry**

315 The median frequency of 3<sup>rd</sup> MHs for pairs of individuals of East Asian, African American, and  
316 European ancestry is shown. Results from pairs of individuals with different ancestry is included  
317 as “Mixed”, all on a log scale for mixing levels of 0.1 – 40%.

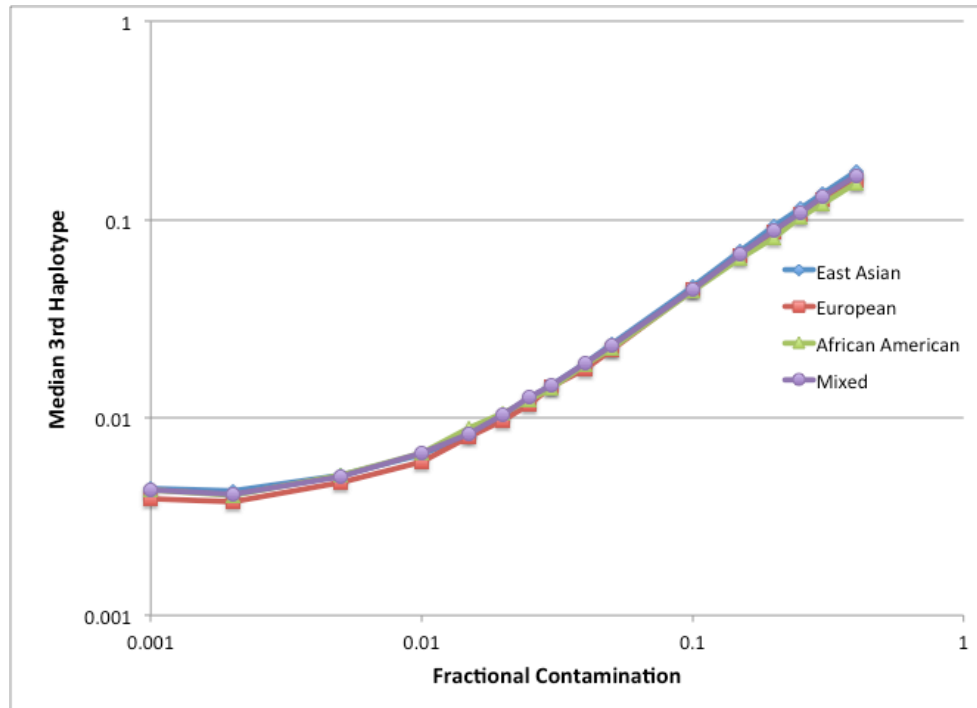

319 The primary limitations on the sensitivity of contamination detection are the practical  
320 sequencing depths for the SNV sets in question and the inherent error rates for sequencing. The  
321 higher the sensitivity desired, the greater sequencing depth required. The usefulness of added  
322 depth is limited by sequencing error rates that are typically on the order of 0.1% for Illumina. It  
323 is possible to employ various error correction methods to improve sensitivity, but the need for  
324 that is dependent on the sensitivity required for the application. In addition, there is no value in  
325 sequencing a sample more deeply than the starting number of input molecules, which can be a  
326 limitation in some situations. Based on these considerations, we have aimed for detection of  
327 contamination at least as low as 1% in these samples.

328 As shown in Fig 4, the median 3<sup>rd</sup> MH level is independent of ancestry with this panel. All three  
329 ancestries and mixed samples behave nearly identically. These data are combined in  
330 Supplementary Table 2. 15 sample/contaminant pairs were tested for each ancestry with the

331 same number of each mixed ancestry pairs. When all samples are aggregated, 40% of samples  
332 with 0.5% contamination were detected. If the threshold is set at 1%, all contaminated samples  
333 were detected. The detection threshold can be set wherever required based on the detection  
334 needs and the likely impact of contamination on final results. However, the core limitations of  
335 sequencing accuracy, coverage depth, and input DNA molecules combine to ultimately limit  
336 sensitivity.

337 In addition to detecting contamination, it is also possible to use this method to identify sources  
338 of contamination. A partial set of genotypes for the contaminating DNA can be generated from  
339 the MH data and then matched with samples that have been tested previously or  
340 contemporaneously to determine if they are the source of contamination. In a contaminated  
341 sample, MHs with 1 or 4 different haplotypes can be assigned their correct genotypes directly.  
342 MHs with 2 or 3 different haplotypes can generally be assigned a partial or complete genotype  
343 based on the frequency of the individual MHs. The frequency of the 2<sup>nd</sup>/3<sup>rd</sup> haplotypes will  
344 provide at least one and sometimes two genotypes corresponding to the contaminant.  
345 Comparison of the known and partial genotypes with other samples allows them to be ruled in  
346 or out as potential sources of contamination. This procedure has been applied to multiple  
347 contaminated samples to successfully determine the source in real clinical laboratory  
348 situations. Often, the contamination source can be shown not to arise from any samples known  
349 to have been handled in the laboratory so the contamination must have originated prior to  
350 sample receipt.

351

## 352 **Discussion**

353 Cross-contamination of DNA samples is a well-known issue among clinical testing laboratories  
354 and hence standard clinical testing guidelines generally suggest that precautions should be  
355 taken to be prevent it. Two recent guidelines for somatic variant testing (29, 30) recommend  
356 checking for handling-induced contamination and, suggest some possible methods for  
357 detecting contamination (6, 10, 31). However, none of the methods mentioned is sensitive  
358 enough to ensure that somatic variants (32) can be distinguished from sample contamination.  
359 Thus, simple, sensitive methods for reliable detection of contamination are needed.

360 The degree of DNA contamination that causes problems varies depending on the application. In  
361 some cases, the impact of contamination on results is obvious. With other applications, signals  
362 arising from contamination can be easily confused with real signals. With diagnosis of somatic  
363 variants in cancer, this is especially a problem because variant identification is attempted at and  
364 below the very limits of the NGS technology. Being able to separate the tumor signal from any  
365 contamination noise is critical for the proper diagnosis of tumors. Because tumor samples often  
366 have highly unusual copy number patterns, use of simple genotype frequencies can cause  
367 errors in contaminant detection. In our experience, many FFPE samples that had been  
368 determined to be contaminated using raw genotype frequencies were found to be pure by MH  
369 analysis (Fig 1). In contrast to FFPE tumor samples, circulating-free DNA (cfDNA) purified from  
370 the plasma of cancer patients is not as prone to the same issues. Most cfDNA purified from  
371 plasma is from normal cells so typical Mendelian ratios are observed with variants. MH analysis  
372 in such samples is still valuable for sensitive contamination detection, but such samples are not

373 as likely to generate false positives as DNA from FFPE tumor samples where copy number  
374 variation is much more significant because of the high tumor DNA content.

375 For most purposes, the approximation that the percent contamination is twice the median  
376 frequency for the 3<sup>rd</sup> MH is sufficient. This relationship arises from the likelihood that a 3<sup>rd</sup> MH  
377 is most likely heterozygous so is present on only one of the two incoming alleles. The  
378 uncertainty around this probability introduces the potential for multiple sources of error and  
379 those should be considered if a more exact measurement is necessary. At low coverage, two  
380 confounding factors arise. First, low coverage leads to high AF variability due to the stochastic  
381 nature of read accumulation in poorly covered SNV sets. Only SNV sets with 3<sup>rd</sup> MHs are  
382 included in the median calculation rather than all SNV sets so, at low coverage, AF inflation  
383 occurs among the variants that are counted. The observed AF is higher than reality because  
384 there are not enough reads to generate the proper AF value. By requiring a large number of 3<sup>rd</sup>  
385 MHs prior to calling a sample contaminated, this effect is mitigated. Superimposed on this  
386 effect is the counting of homozygous 3<sup>rd</sup> MHs before heterozygous 3<sup>rd</sup> MHs as coverage  
387 increases. If coverage is deep, this is not an issue but, at low coverage, homozygous variants will  
388 appear first because they are being double counted. Further complicating the relationship is the  
389 presence of low frequency technical artifacts and the copy number issues that can occur with  
390 cancer samples. The copy number variations will make SNV sets appear at different fractional  
391 rates depending on whether the 3<sup>rd</sup> MH is under- or over-represented. The more SNV sets used  
392 in the calculations, the more likely it is that these effects can be averaged out.

393 The MH approach is perfectly suited for use when somatic variants are sought because such  
394 studies use very high coverage in order to detect rare variants. The sensitivity of contamination

395 detection is limited by the coverage of the regions used in the analysis. Other panel-based and  
396 exome NGS approaches can be made more reliable by using similar contamination detection  
397 methods. A typical whole genome approach with less than 50x coverage would not be  
398 amenable to sensitive detection using individual MH sets because the low coverage would  
399 prevent the observation of infrequent 3<sup>rd</sup> MHs. To overcome this, combinations of MH sets  
400 could be used. The simplest approach would be to combine SNV sets that are in high LD. Other  
401 methods for pooling SNV sets could also be used.

402 The theoretical limitation on the sensitivity of the MH assay is the number of DNA molecules  
403 available for study. The assay can only be as sensitive as the amount of input DNA allows. In  
404 addition to that limitation (which is significant for some samples), there are also technology  
405 limitations. When looking at a pair of SNVs, either one could be called incorrectly resulting in  
406 false 3<sup>rd</sup> MHs. If panels with 3 or more SNVs in close proximity were available, this would  
407 minimize such errors. However, there are other potential errors introduced in NGS processing.  
408 It is not unusual for barcodes used for multiplexing samples in the same run to be  
409 contaminated at 1% or more, resulting in misassignment of reads to samples. Index hopping  
410 and chimeric PCR reads can also affect sensitivity (33, 34).

411 The same techniques used for these cancer samples can also be used with forensic samples to  
412 detect contributors to a sample. Unlike tumor samples, copy number is not an issue. Like tumor  
413 samples, the major and minor contributors to a sample may have different DNA qualities that  
414 can affect the accuracy of MH frequencies, but this is less important in forensic situations.  
415 Panels designed with a larger number of >4 potential MHs would be appropriate when forensic  
416 samples are being examined to clarify the number of contributors.

417 Another useful application of the MH methods is for detection of CNV anomalies in fetal DNA in  
418 Non-invasive prenatal testing (NIPT). MH methods are already in use for paternity testing (35-  
419 38). For NIPT, panels can be designed to focus on genomic regions with the most likely copy  
420 number variation (e. g. chr 5, 13, 18, or 21) and the frequency of 3<sup>rd</sup> MHs in targeted regions  
421 compared to the rest of the genome. In genomic regions where the mother is heterozygous and  
422 the father's contribution is a different allele, there will be a low frequency 3<sup>rd</sup> MH.

423 The methods described here highlight the factors that are important for examining DNA  
424 mixtures in a variety of contexts. The use of MHs in these applications requires different  
425 properties than other uses (39). Most early studies with MHs focus on distinguishing individuals  
426 and assigning ancestry. The MH properties required in those situations are different with a  
427 need for MHs specific for particular populations. With MHs used for contamination detection, it  
428 is preferable to have MHs that are common to all populations so that detection is uniform  
429 across individuals. The methods described herein allow the appropriate choice of MHs leading  
430 to the ability to detect low levels of secondary DNA, which can be valuable in many  
431 applications.

432

#### 433 *Abbreviations*

434 **AdAm:** Admixed American

435 **AF:** Allele Frequency

436 **AfAm:** African American

437 **Afri:** African

438 **cfDNA:** circulating free DNA

439 **EaAs:** East Asian

- 440 **Euro:** European
- 441 **FFPE:** Formalin-fixed Paraffin-embedded
- 442 **FP:** False Positive
- 443 **LD:** Linkage Disequilibrium
- 444 **MH:** Microhaplotype
- 445 **NGS:** Next-generation Sequencing
- 446 **NIPT:** Non-invasive Prenatal Testing
- 447 **PCA:** Principle Component Analysis
- 448 **SNV:** Single Nucleotide Variant
- 449 **SoAs:** South Asian
- 450 **STR:** Short Tandem Repeat



451 **References**

- 452 1. Flickinger M, Jun G, Abecasis GR, Boehnke M, Kang HM. Correcting for Sample Contamination  
453 in Genotype Calling of DNA Sequence Data. *Am J Hum Genet.* 2015, 97: 284-90.
- 454 2. Cibulskis K, McKenna A, Fennell T, Banks E, DePristo M, Getz G. ContEst: estimating cross-  
455 contamination of human samples in next-generation sequencing data. *Bioinformatics.* 2011, 27:  
456 2601-2.
- 457 3. Sakarya, 2017, [https://grail.com/wp-](https://grail.com/wp-content/uploads/2018/05/HiTSeq_2017_Sakarya_Conta_POS_Final.pdf)  
458 [content/uploads/2018/05/HiTSeq\\_2017\\_Sakarya\\_Conta\\_POS\\_Final.pdf](https://grail.com/wp-content/uploads/2018/05/HiTSeq_2017_Sakarya_Conta_POS_Final.pdf)
- 459 4. Fiévet A, Bernard V, Tenreiro H, Dehainault C, Girard E, Deshaies V et al. ART-DeCo: easy tool  
460 for detection and characterization of cross-contamination of DNA samples in diagnostic next-  
461 generation sequencing analysis. *Eur J Hum Genet.* 2019, 27: 792-800.
- 462 5. Li YY, Schmidt RJ, Manning DK, Jia Y, Dong F. Contamination Assessment for Cancer Next-  
463 Generation Sequencing: Method Development and Clinical Implementation. *Arch Pathol Lab*  
464 *Med.* 2021.
- 465 6. Jun G, Flickinger M, Hetrick KN, Romm JM, Doheny KF, Abecasis GR, et al. Detecting and  
466 estimating contamination of human DNA samples in sequencing and array-based genotype  
467 data. *Am J Hum Genet* 2012, 91: 839-848.
- 468 7. Zhang F, Flickinger M, Taliun SAG; InPSYght Psychiatric Genetics Consortium, Abecasis GR,  
469 Scott LJ, et al. Ancestry-agnostic estimation of DNA sample contamination from sequence  
470 reads. *Genome Res.* 2020, 30: 185-194.

- 471 8. Bergmann EA, Chen BJ, Arora K, Vacic V, Zody MC. Conpair: concordance and contamination  
472 estimator for matched tumor-normal pairs. *Bioinformatics*. 2016, 32: 3196-3198.
- 473 9. Grskovic M, Hiller DJ, Eubank LA, Sninsky JJ, Christopherson C, Collins JP, et al. Validation of a  
474 Clinical-Grade Assay to Measure Donor-Derived Cell-Free DNA in Solid Organ Transplant  
475 Recipients. *J Mol Diagn*. 2016, 18: 890-902.
- 476 10. Sehn JK, Spencer DH, Pfeifer JD, Bredemeyer AJ, Cottrell CE, Abel HJ, et al. Occult Specimen  
477 Contamination in Routine Clinical Next-Generation Sequencing Testing. *Am J Clin Pathol*. 2015,  
478 144: 667-74.
- 479 11. Kidd KK, Pakstis AJ, Speed WC, Lagace R, Chang J, Wootton S, et al. Microhaplotype loci are  
480 a powerful new type of forensic marker. *FSI Supplement Series*. 2013, 4:e123-e124.
- 481 12. Kidd KK, Pakstis AJ, Speed WC, Lagacé R, Chang J, Wootton S, et al. Current sequencing  
482 technology makes microhaplotypes a powerful new type of genetic marker for forensics.  
483 *Forensic Sci Int Genet*. 2014, 12: 215-24.
- 484 13. Kidd KK, Speed WC. Criteria for selecting microhaplotypes: mixture detection and  
485 deconvolution. *Investig Genet*. 2015, 6:1.
- 486 14. Voskoboinik L, Motro U, Darvasi A. Facilitating complex DNA mixture interpretation by  
487 sequencing highly polymorphic haplotypes. *Forensic Sci Int Genet*. 2018, 35: 136-140.
- 488 15. Oldoni F, Kidd KK, Podini D. Microhaplotypes in forensic genetics. *Forensic Sci Int Genet*.  
489 2019, 38: 54-69.

- 490 16. Chen P, Deng C, Li Z, Pu Y, Yang J, Yu Y, et al. A microhaplotypes panel for massively parallel  
491 sequencing analysis of DNA mixtures. *Forensic Sci Int Genet.* 2019, 40: 140-149.
- 492 17. Yang J, Lin D, Deng C, Li Z, Pu Y, Yu Y, et al. The advances in DNA mixture interpretation.  
493 *Forensic Sci Int.* 2019, 301: 101-106.
- 494 18. Debeljak M, Freed DN, Welch JA, Haley L, Beierl K, Iglehart BS, et al. Haplotype counting by  
495 next-generation sequencing for ultrasensitive human DNA detection. *J Mol Diagn.* 2014, 16:  
496 495-503.
- 497 19. Bulbul O, Pakstis AJ, Soundararajan U, Gurkan C, Brissenden JE, Roscoe JM, et al. Ancestry  
498 inference of 96 population samples using microhaplotypes. *Int J Legal Med.* 2018, 132: 703-711.
- 499 20. Kidd KK, Speed WC, Pakstis AJ, Podini DS, Lagacé R, Chang J, et al. Evaluating 130  
500 microhaplotypes across a global set of 83 populations. *Forensic Sci Int Genet.* 2017, 29: 29-37.
- 501 21. Cheung EYY, Phillips C, Eduardoff M, Lareu MV, McNevin D. Performance of ancestry-  
502 informative SNP and microhaplotype markers. *Forensic Sci Int Genet.* 2019, 43:102141.
- 503 22. Phillips C, McNevin D, Kidd KK, Lagacé R, Wootton S, de la Puente M, et al. MAPlex - A  
504 massively parallel sequencing ancestry analysis multiplex for Asia-Pacific populations. *Forensic  
505 Sci Int Genet.* 2019, 42: 213-226.
- 506 23. Oldoni F, Yoon L, Wootton SC, Lagacé R, Kidd KK, Podini D. Population genetic data of 74  
507 microhaplotypes in four major U.S. population groups. *Forensic Sci Int Genet.* 2020, 49: 102398.
- 508 24. Phallen J, Sausen M, Adleff V, Leal A, Hruban C, White J, et al. Direct detection of early-stage  
509 cancers using circulating tumor DNA. *Sci Transl Med.* 2017, 9:2415.

- 510 25. Georgiadis A, Durham JN, Keefer LA, Bartlett BR, Zielonka M, Murphy D, et al. Noninvasive  
511 Detection of Microsatellite Instability and High Tumor Mutation Burden in Cancer Patients  
512 Treated with PD-1 Blockade. *Clin Cancer Res*. 2019, 25: 7024-7034.
- 513 26. Wood DE, White JR, Georgiadis A, Van Emburgh B, Parpart-Li S, Mitchell J, et al. A machine  
514 learning approach for somatic mutation discovery. *Sci Transl Med*. 2018, 10: 7939.
- 515 27. Karczewski KJ, Francioli LC, Tiao G, Cummings BB, Alföldi J, Wang Q, et al. The mutational  
516 constraint spectrum quantified from variation in 141,456 humans. *Nature*. 2020 581: 434-443.
- 517 28. Machiela MJ, Chanock SJ. LDlink: a web-based application for exploring population-specific  
518 haplotype structure and linking correlated alleles of possible functional variants. *Bioinformatics*.  
519 2015.
- 520 29. Jennings LJ, Arcila ME, Corless C, Kamel-Reid S, Lubin IM, Pfeifer J, et al. Guidelines for  
521 Validation of Next-Generation Sequencing-Based Oncology Panels: A Joint Consensus  
522 Recommendation of the Association for Molecular Pathology and College of American  
523 Pathologists. *J Mol Diagn*. 2017, 19: 341-365.
- 524 30. Naito Y, Aburatani H, Amano T, Baba E, Furukawa T, Hayashida T, et al. Clinical practice  
525 guidance for next-generation sequencing in cancer diagnosis and treatment (edition 2.1). *Int J*  
526 *Clin Oncol*. 2021, 26: 233-283.
- 527 31. Mathias PC, Turner EH, Scroggins SM, Salipante SJ, Hoffman NG, Pritchard CC, et al.  
528 Applying ancestry and sex computation as a quality control tool in targeted next generation  
529 sequencing. *Am J Clin Pathol* 2016, 145: 308-315.

- 530 32. Verma S, Moore MW, Ringler R, Ghosal A, Horvath K, Naef T, et al. Analytical performance  
531 evaluation of a commercial next generation sequencing liquid biopsy platform using plasma  
532 ctDNA, reference standards, and synthetic serial dilution samples derived from normal plasma.  
533 BMC Cancer. 2020; 20: 945.
- 534 33. Costello M, Fleharty M, Abreu J, Farjoun Y, Ferriera S, Holmes L, et al. Characterization and  
535 remediation of sample index swaps by non-redundant dual indexing on massively parallel  
536 sequencing platforms. BMC Genomics. 2018, 19:332.
- 537 34. Potapov V, Ong JL. Examining Sources of Error in PCR by Single-Molecule Sequencing. PLoS  
538 One. 2017, 12:e0169774. doi: 10.1371/journal.pone.0169774.
- 539 35. Ou X, Qu N. Noninvasive prenatal paternity testing by target sequencing microhaps.  
540 Forensic Sci Int Genet. 2020, 48: 102338.
- 541 36. Wang JYT, Whittle MR, Puga RD, Yambartsev A, Fujita A, Nakaya HI. Noninvasive prenatal  
542 paternity determination using microhaplotypes: a pilot study. BMC Med Genomics. 2020,  
543 13:157.
- 544 37. Sun S, Liu Y, Li J, Yang Z, Wen D, Liang W, et al. Development and application of a nonbinary  
545 SNP-based microhaplotype panel for paternity testing involving close relatives. Forensic Sci Int  
546 Genet. 2020, 46:102255.
- 547 38. Bai Z, Zhao H, Lin S, Huang L, He Z, Wang H, Ou X. Evaluation of a Microhaplotype-Based  
548 Noninvasive Prenatal Test in Twin Gestations: Determination of Paternity, Zygosity, and Fetal  
549 Fraction. Genes (Basel). 2020, 12: 26.

- 550 39. Kidd KK, Pakstis AJ, Speed WC, Lagace R, Wootton S, Chang J. Selecting microhaplotypes  
551 optimized for different purposes. *Electrophoresis*. 2018, 39: 2815-2823.

552 **Table 1 Microhaplotypes and Coverage for Pure Samples**

553 Performance of the 164 SNV set panel is shown with 51 pure samples with known ancestries. Comparisons include the median and  
 554 average coverage, the number of SNV sets with 1-4 MHs, and the median frequency of 3<sup>rd</sup> MHs among individuals of African (Afri),  
 555 East Asian (EaAs), and European (Euro) ancestry as defined by the 1000 Genomes project. The number and median 3<sup>rd</sup> MH  
 556 frequency for MHs with frequency >0.2% is shown. ND=Not Done; NA=Not Applicable

557

| Sample    | M/<br>F | Ancestry | Number of MHs |    |    |   | Med<br>3rd<br>MH | # 3 <sup>rd</sup><br>MHs<br>>0.002 | Med<br>3 <sup>rd</sup><br>>0.002 | #   | Med<br>Cov | Ave<br>Cov |
|-----------|---------|----------|---------------|----|----|---|------------------|------------------------------------|----------------------------------|-----|------------|------------|
|           |         |          | 1             | 2  | 3  | 4 |                  |                                    |                                  |     |            |            |
| AATF748T  |         | Afri     | 52            | 87 | 21 | 3 | 0.0033           | 18                                 | 0.0081                           | 163 | 313        | 620        |
| AATF094T  | F       | Afri     | 36            | 90 | 36 | 0 | 0.0027           | 29                                 | 0.0031                           | 162 | 421        | 533        |
| AATF115T  | F       | Afri     | 67            | 82 | 12 | 0 | 0.0027           | 7                                  | 0.0059                           | 161 | 202        | 286        |
| AATF066T  | F       | Afri     | 48            | 92 | 21 | 0 | 0.0041           | 17                                 | 0.0044                           | 161 | 305        | 337        |
| AATF117T  | F       | Afri     | 37            | ## | 22 | 1 | 0.0053           | 18                                 | 0.0065                           | 163 | 439        | 605        |
| AATF498T  | F       | Afri     | 68            | 76 | 19 | 0 | 0.0018           | 8                                  | 0.0037                           | 163 | 674        | 959        |
| AATF308T  | M       | Afri     | 42            | 96 | 24 | 0 | 0.0022           | 14                                 | 0.0033                           | 162 | 531        | 683        |
| AATF562T  |         | Afri     | 46            | ## | 14 | 1 | 0.0021           | 8                                  | 0.0029                           | 163 | 574        | 706        |
| AATF486T  | F       | Afri     | 39            | 88 | 36 | 0 | 0.0023           | 21                                 | 0.0034                           | 163 | 709        | 924        |
| PGRD0454T | M       | Afri     | 58            | 90 | 14 | 0 | 0.0018           | 6                                  | 0.0027                           | 162 | 797        | 930        |
| AATF218T  | F       | Afri     | 42            | 88 | 33 | 1 | 0.0029           | 24                                 | 0.0034                           | 164 | 405        | 555        |
| AATF778T  |         | Afri     | 60            | 91 | 11 | 1 | 0.0023           | 7                                  | 0.0055                           | 163 | 462        | 520        |

|          |   |      |    |    |    |   |        |    |        |     |     |     |
|----------|---|------|----|----|----|---|--------|----|--------|-----|-----|-----|
| AATF219T | M | Afri | 33 | 95 | 34 | 1 | 0.0022 | 19 | 0.0039 | 163 | 553 | 668 |
| AATF217T | M | Afri | 57 | 90 | 15 | 0 | 0.0018 | 5  | 0.0029 | 162 | 609 | 996 |
| AATF073T | F | EaAs | 74 | 78 | 12 | 0 | 0.0021 | 7  | 0.0028 | 164 | 415 | 726 |
| AATF503T | F | EaAs | 62 | 76 | 24 | 1 | 0.0031 | 16 | 0.0037 | 163 | 426 | 545 |
| AATF504T | M | EaAs | 70 | 84 | 8  | 1 | 0.0042 | 9  | 0.0042 | 163 | 517 | 758 |
| AATF027T | M | EaAs | 58 | 92 | 13 | 1 | 0.0024 | 8  | 0.0052 | 164 | 331 | 443 |
| AATF012T | F | EaAs | 66 | 91 | 7  | 0 | 0.0029 | 5  | 0.0050 | 164 | 542 | 826 |
| AATF029T | M | EaAs | 42 | 74 | 46 | 1 | 0.0033 | 37 | 0.0035 | 163 | 379 | 590 |
| AATF024T | F | EaAs | 31 | 82 | 48 | 2 | 0.0037 | 39 | 0.0051 | 163 | 452 | 724 |
| AATF023T | M | EaAs | 33 | 91 | 36 | 3 | 0.0025 | 26 | 0.0028 | 163 | 500 | 765 |
| AATF022T | M | EaAs | 42 | 92 | 30 | 0 | 0.0023 | 19 | 0.0046 | 164 | 510 | 768 |
| AATF021T | M | EaAs | 56 | 78 | 29 | 0 | 0.0027 | 19 | 0.0041 | 163 | 528 | 792 |
| AATF733T | F | EaAs | 53 | 93 | 17 | 0 | 0.0047 | 12 | 0.0086 | 163 | 170 | 257 |
| AATF595T | F | EaAs | 53 | 84 | 27 | 0 | 0.0038 | 19 | 0.0098 | 164 | 201 | 390 |
| AATF742T | F | EaAs | 51 | ## | 10 | 0 | 0.0020 | 5  | 0.0128 | 163 | 210 | 352 |
| AATF734T | M | EaAs | 60 | 89 | 13 | 1 | 0.0029 | 11 | 0.0032 | 163 | 344 | 431 |
| AATF594T |   | EaAs | 64 | 92 | 7  | 0 | 0.0028 | 5  | 0.0030 | 163 | 390 | 533 |
| AATF735T | M | EaAs | 68 | 88 | 6  | 1 | 0.0025 | 5  | 0.0027 | 163 | 399 | 614 |
| AATF597T | F | EaAs | 54 | 94 | 14 | 1 | 0.0021 | 8  | 0.0062 | 163 | 399 | 502 |
| AATF606T | F | EaAs | 62 | 85 | 15 | 0 | 0.0023 | 10 | 0.0029 | 162 | 443 | 659 |
| AATF601T | F | EaAs | 58 | 85 | 20 | 0 | 0.0022 | 11 | 0.0030 | 163 | 457 | 570 |
| AATF599T | F | EaAs | 58 | 84 | 21 | 1 | 0.0025 | 15 | 0.0042 | 164 | 487 | 648 |
| AATF600T | F | EaAs | 52 | 94 | 16 | 1 | 0.0024 | 10 | 0.0028 | 163 | 605 | 752 |
| AATF417T | M | Euro | 67 | 90 | 5  | 1 | 0.0142 | 5  | 0.0176 | 163 | 187 | 239 |
| AATF391T | M | Euro | 47 | 95 | 20 | 1 | 0.0019 | 10 | 0.0023 | 163 | 476 | 754 |



|          |   |      |    |    |    |   |        |    |        |     |     |     |
|----------|---|------|----|----|----|---|--------|----|--------|-----|-----|-----|
| AATF375T | M | Euro | 34 | 97 | 32 | 1 | 0.0052 | 30 | 0.0056 | 164 | 305 | 463 |
| AATF088T | F | Euro | 41 | 99 | 21 | 1 | 0.0029 | 16 | 0.0038 | 162 | 288 | 406 |
| AATF389T | F | Euro | 39 | 94 | 30 | 1 | 0.0021 | 16 | 0.0030 | 164 | 446 | 741 |
| AATF567T | M | Euro | 68 | 84 | 10 | 0 | 0.0035 | 8  | 0.0053 | 162 | 312 | 704 |
| AATF107T | M | Euro | 51 | 98 | 13 | 1 | 0.0034 | 9  | 0.0066 | 163 | 445 | 518 |
| AATF079T | F | Euro | 58 | 94 | 10 | 0 | 0.0016 | 4  | 0.0041 | 162 | 494 | 641 |
| AATF496T | M | Euro | 62 | 94 | 8  | 0 | 0.0018 | 2  | 0.0322 | 164 | 601 | 674 |
| AATF036T | M | Euro | 44 | 97 | 20 | 2 | 0.0029 | 15 | 0.0030 | 163 | 538 | 603 |
| AATF042T | M | Euro | 39 | 93 | 31 | 1 | 0.0020 | 16 | 0.0027 | 164 | 613 | 747 |
| AATF039T | M | Euro | 49 | ## | 11 | 0 | 0.0020 | 5  | 0.0035 | 162 | 693 | 842 |
| AATF038T | F | Euro | 50 | 94 | 16 | 2 | 0.0015 | 7  | 0.0031 | 162 | 673 | 789 |
| AATF731T | F | Euro | 59 | 87 | 17 | 1 | 0.0024 | 12 | 0.0027 | 164 | 352 | 495 |
| AATF378T | F | Mix  | 52 | 94 | 17 | 1 | 0.0028 | 12 | 0.0042 | 164 | 418 | 707 |
| AATF097T | F | Mix  | 35 | 98 | 30 | 0 | 0.0035 | 22 | 0.0042 | 163 | 416 | 486 |
| Median   |   |      | 52 | 91 | 17 | 1 | 0.0025 | 11 | 0.0038 | 163 | 445 | 641 |
| Mean     |   |      | 52 | 90 | 20 | 1 | 0.0030 | 13 | 0.0052 | 163 | 450 | 623 |

558

559

560 **Supplementary Table 1 Detailed characterization of MH sets**

561 The genomic locations of all SNV sets tested are shown in column 1. Median coverage in 849 samples and the number of instances  
562 of more than 2 MHs are shown in the next columns. The distance between SNVs and the dbSNP identifiers are listed in the next  
563 columns. The final columns show the sum of frequencies for all 3<sup>rd</sup> and 4<sup>th</sup> MHs from the 1000 genome database and the reason for  
564 why SNVs were removed from the final panel, if applicable.

565 **Supplementary Table 2 Detection of in silico mixtures versus 3<sup>rd</sup> MH threshold**

566 Pure samples were mixed in 15 different combinations from each ancestry group (Afri, EaAs, Euro) as well as 15 different mixed  
567 ancestry combinations. For each threshold 3<sup>rd</sup> MH frequency, the percent of all samples that scored as contaminated at that level of  
568 contamination are listed at each level of in silico mixing.

569

## 570 Supplementary Table 1

| Location                 | Final Panel | Med Cov | MH >2 | SNV Len | SNV1       | SNV2       | SNV3 | Afri 3+4 | EaAs 3+4 | Euro 3+4 | AdAm 3+4 | SoAs 3+4 | AfAm 3+4 | Reason for Omitting |
|--------------------------|-------------|---------|-------|---------|------------|------------|------|----------|----------|----------|----------|----------|----------|---------------------|
| chr1:23885498-23885599   |             | 692     | 25    | 102     | rs11574    | rs2067053  |      | 0.011    | 0.028    | 0.242    | 0.261    | 0.081    | 0.016    | MH>2                |
| chr1:46641827-46641837   |             | 296     | 1     | 11      | rs12030928 | rs12752892 |      | 0.017    | 0.000    | 0.125    | 0.071    | 0.080    | 0.057    | Balance             |
| chr1:120057158-120057246 |             | 689     | 3     | 89      | rs6203     | rs45609334 |      | 0.033    | 0.082    | 0.235    | 0.205    | 0.157    | 0.090    | Balance             |
| chr1:156846120-156846233 | Yes         | 1526    | 2     | 114     | rs1800880  | rs6334     |      | 0.105    | 0.139    | 0.065    | 0.117    | 0.244    | 0.098    |                     |
| chr1:226573364-226573402 | Yes         | 2011    | 1     | 39      | rs1805414  | rs1805408  |      | 0.143    | 0.205    | 0.159    | 0.147    | 0.183    | 0.164    |                     |
| chr1:226589833-226589958 | Yes         | 361     | 2     | 126     | rs1805407  | rs1805404  |      | 0.115    | 0.251    | 0.154    | 0.147    | 0.100    | 0.164    |                     |
| chr2:16042003-16042051   | Yes         | 392     | 1     | 49      | rs2693006  | rs67056216 |      | 0.113    | 0.177    | 0.177    | 0.159    | 0.264    | 0.123    |                     |
| chr2:16073257-16073263   | Yes         | 1546    | 2     | 7       | rs12986946 | rs12986949 |      | 0.052    | 0.000    | 0.101    | 0.058    | 0.115    | 0.098    |                     |
| chr2:16112814-16112828   | Yes         | 835     | 1     | 15      | rs16863159 | rs6716344  |      | 0.022    | 0.276    | 0.088    | 0.244    | 0.131    | 0.148    |                     |
| chr2:16113594-16113723   | Yes         | 368     | 4     | 130     | rs34339850 | rs6741005  |      | 0.052    | 0.284    | 0.217    | 0.183    | 0.245    | 0.066    |                     |
| chr2:29416366-29416481   |             | 677     | 2     | 116     | rs1881421  | rs1881420  |      | 0.240    | 0.000    | 0.150    | 0.127    | 0.027    | 0.312    | Balance             |
| chr2:29416481-29416615   |             | 750     | 15    | 135     | rs1881420  | rs56132472 |      | 0.078    | 0.000    | 0.123    | 0.065    | 0.024    | 0.090    | MH>2                |
| chr2:29446184-29446202   | Yes         | 2130    | 0     | 19      | rs2276550  | rs4622670  |      | 0.259    | 0.054    | 0.236    | 0.222    | 0.203    | 0.033    |                     |
| chr2:29446701-29446721   | Yes         | 686     | 1     | 21      | rs12619049 | rs4665447  |      | 0.412    | 0.081    | 0.026    | 0.062    | 0.015    | 0.320    |                     |
| chr2:29447108-29447253   | Yes         | 448     | 1     | 146     | rs4387740  | rs6723311  |      | 0.390    | 0.141    | 0.254    | 0.232    | 0.173    | 0.426    |                     |
| chr2:47800577-47800603   | Yes         | 1072    | 0     | 27      | rs56239373 | rs3814360  |      | 0.077    | 0.154    | 0.042    | 0.065    | 0.086    | 0.057    |                     |
| chr2:47852559-47852643   | Yes         | 293     | 5     | 85      | rs6722699  | rs10165802 |      | 0.110    | 0.076    | 0.093    | 0.104    | 0.061    | 0.139    |                     |
| chr2:47856243-47856328   |             | 572     | 8     | 86      | rs11892597 | rs11887626 |      | 0.209    | 0.078    | 0.273    | 0.203    | 0.261    | 0.205    | MH>2                |
| chr2:48010488-48010558   |             | 1461    | 2     | 71      | rs1042821  | rs1042820  |      | 0.020    | 0.000    | 0.175    | 0.114    | 0.065    | 0.033    | Balance             |
| chr2:112754828-112754880 |             | 366     | 1     | 53      | rs3811632  | rs3811633  |      | 0.103    | 0.106    | 0.287    | 0.189    | 0.230    | 0.156    | Balance             |
| chr2:112754943-112755001 |             | 747     | 3     | 59      | rs3811634  | rs2230515  |      | 0.104    | 0.106    | 0.287    | 0.189    | 0.230    | 0.156    | Balance             |
| chr2:113980645-113980736 |             | 550     | 0     | 92      | rs12472361 | rs56865224 |      | 0.017    | 0.073    | 0.110    | 0.117    | 0.129    | 0.057    |                     |
| chr2:113982584-113982608 |             | 540     | 0     | 25      | rs4849177  | rs4849178  |      | 0.017    | 0.077    | 0.164    | 0.138    | 0.183    | 0.057    |                     |
| chr2:113983937-113984033 | Yes         | 776     | 1     | 97      | rs3748915  | rs3748916  |      | 0.203    | 0.086    | 0.163    | 0.135    | 0.229    | 0.213    |                     |
| chr2:113984503-113984594 | Yes         | 1400    | 0     | 92      | rs2241975  | rs67776659 |      | 0.142    | 0.013    | 0.110    | 0.087    | 0.038    | 0.074    |                     |

|                          |     |      |   |     |            |             |            |       |       |       |       |       |       |                    |
|--------------------------|-----|------|---|-----|------------|-------------|------------|-------|-------|-------|-------|-------|-------|--------------------|
| chr2:113985170-113985186 |     | 1536 | 2 | 17  | rs4849179  | rs4849180   |            | 0.020 | 0.077 | 0.163 | 0.138 | 0.183 | 0.066 | LD,<br>homopolymer |
| chr2:113989236-113989267 | Yes | 1009 | 2 | 32  | rs2863242  | rs2863243   |            | 0.017 | 0.074 | 0.163 | 0.138 | 0.183 | 0.057 |                    |
| chr2:113990242-113990261 |     | 2923 | 0 | 20  | rs2166421  | rs7421852   |            | 0.011 | 0.074 | 0.162 | 0.135 | 0.183 | 0.041 | LD,<br>homopolymer |
| chr2:202122956-202122995 | Yes | 1337 | 0 | 40  | rs3769824  | rs3769823   |            | 0.000 | 0.000 | 0.047 | 0.114 | 0.043 | 0.016 |                    |
| chr3:12641425-12641518   |     | 346  | 1 | 94  | rs5746223  | rs2246390   |            | 0.040 | 0.030 | 0.111 | 0.125 | 0.065 | 0.090 | Balance            |
| chr3:12642945-12643013   |     | 277  | 3 | 69  | rs3773345  | rs904464    | rs904452   | 0.145 | 0.031 | 0.192 | 0.114 | 0.052 | 0.148 | Balance            |
| chr3:12649857-12649937   | Yes | 567  | 2 | 81  | rs2055311  | rs963959    |            | 0.225 | 0.028 | 0.164 | 0.310 | 0.125 | 0.221 |                    |
| chr3:36986932-36986992   | Yes | 2760 | 4 | 61  | rs2276809  | rs2276808   |            | 0.073 | 0.077 | 0.115 | 0.160 | 0.216 | 0.090 |                    |
| chr3:36986992-36987083   |     | 2802 | 6 | 92  | rs2276808  | rs2276807   |            | 0.210 | 0.000 | 0.048 | 0.078 | 0.000 | 0.303 | MH>2               |
| chr3:37022803-37022864   |     | 345  | 0 | 62  | rs4678921  | rs4678922   |            | 0.082 | 0.000 | 0.000 | 0.026 | 0.000 | 0.213 | Balance            |
| chr3:71247257-71247304   | Yes | 1098 | 0 | 48  | rs939845   | rs2037474   |            | 0.163 | 0.104 | 0.064 | 0.202 | 0.044 | 0.139 |                    |
| chr3:138327951-138328016 | Yes | 634  | 1 | 66  | rs61699523 | rs111398337 |            | 0.167 | 0.020 | 0.028 | 0.071 | 0.110 | 0.295 |                    |
| chr3:142277536-142277575 | Yes | 642  | 0 | 40  | rs2227929  | rs2227930   |            | 0.147 | 0.118 | 0.200 | 0.154 | 0.158 | 0.188 |                    |
| chr3:178968634-178968660 |     | 1223 | 0 | 27  | rs7645550  | rs1170672   |            | 0.041 | 0.000 | 0.095 | 0.038 | 0.170 | 0.057 | Balance            |
| chr3:178984575-178984679 | Yes | 2320 | 2 | 105 | rs7612684  | rs7646600   |            | 0.302 | 0.011 | 0.177 | 0.131 | 0.132 | 0.213 |                    |
| chr3:178986121-178986203 | Yes | 623  | 5 | 83  | rs73188921 | rs9830427   | rs9830432  | 0.158 | 0.119 | 0.054 | 0.076 | 0.190 | 0.131 |                    |
| chr3:178990402-178990462 | Yes | 1179 | 1 | 61  | rs2864411  | rs6443633   |            | 0.017 | 0.142 | 0.000 | 0.050 | 0.045 | 0.098 |                    |
| chr3:183211906-183212026 |     | 536  | 2 | 121 | rs1520101  | rs2256061   |            | 0.128 | 0.000 | 0.182 | 0.123 | 0.162 | 0.238 | Balance            |
| chr4:1745492-1745500     | Yes | 4202 | 2 | 9   | rs4865466  | rs4865467   |            | 0.126 | 0.144 | 0.217 | 0.306 | 0.229 | 0.139 |                    |
| chr4:1747971-1748069     |     | 1482 | 1 | 99  | rs4572936  | rs4558926   |            | 0.049 | 0.000 | 0.156 | 0.095 | 0.082 | 0.098 | Balance            |
| chr4:1748200-1748266     |     | 2245 | 8 | 67  | rs4507432  | rs4597899   | rs62285133 | 0.328 | 0.159 | 0.392 | 0.311 | 0.273 | 0.336 | MH>2               |
| chr4:1750487-1750584     | Yes | 1702 | 3 | 98  | rs7680647  | rs73202803  |            | 0.042 | 0.161 | 0.235 | 0.180 | 0.121 | 0.057 |                    |
| chr4:1785738-1785791     |     | 2874 | 2 | 54  | rs1867926  | rs61407096  |            | 0.063 | 0.000 | 0.158 | 0.157 | 0.087 | 0.074 | Balance            |
| chr4:1788994-1789044     | Yes | 678  | 4 | 51  | rs11248077 | rs11248078  |            | 0.249 | 0.233 | 0.383 | 0.346 | 0.377 | 0.254 |                    |
| chr4:1796629-1796636     | Yes | 319  | 1 | 8   | rs3135841  | rs3135842   |            | 0.254 | 0.051 | 0.094 | 0.141 | 0.061 | 0.262 |                    |

|                          |     |      |    |     |            |            |            |       |       |       |       |       |       |         |
|--------------------------|-----|------|----|-----|------------|------------|------------|-------|-------|-------|-------|-------|-------|---------|
| chr4:1797741-1797852     | Yes | 995  | 4  | 112 | rs3135848  | rs743682   |            | 0.227 | 0.056 | 0.092 | 0.144 | 0.062 | 0.271 |         |
| chr4:54269096-54269173   | Yes | 557  | 1  | 78  | rs10001201 | rs62325166 |            | 0.050 | 0.133 | 0.140 | 0.105 | 0.046 | 0.082 |         |
| chr4:54526892-54526902   |     | 647  | 2  | 11  | rs12649494 | rs2668565  |            | 0.023 | 0.093 | 0.153 | 0.079 | 0.117 | 0.082 | Balance |
| chr4:54589337-54589371   |     | 445  | 21 | 35  | rs2590827  | rs75219949 |            | 0.054 | 0.223 | 0.140 | 0.208 | 0.207 | 0.115 | MH>2    |
| chr4:54657737-54657790   | Yes | 288  | 5  | 54  | rs28489910 | rs4864823  |            | 0.233 | 0.111 | 0.209 | 0.226 | 0.148 | 0.254 |         |
| chr4:55049698-55049751   |     | 310  | 3  | 54  | rs13131212 | rs7659596  |            | 0.028 | 0.061 | 0.215 | 0.159 | 0.242 | 0.041 | Balance |
| chr4:55208737-55208788   | Yes | 284  | 3  | 52  | rs2412560  | rs10018115 | rs73234206 | 0.202 | 0.247 | 0.200 | 0.270 | 0.317 | 0.361 |         |
| chr4:55477000-55477073   |     | 991  | 4  | 74  | rs17827038 | rs2703460  |            | 0.020 | 0.072 | 0.134 | 0.098 | 0.195 | 0.090 | Balance |
| chr4:55501109-55501195   | Yes | 357  | 5  | 87  | rs6554196  | rs6554197  |            | 0.110 | 0.110 | 0.200 | 0.163 | 0.223 | 0.230 |         |
| chr4:55582037-55582068   | Yes | 714  | 3  | 32  | rs76272262 | rs3134889  |            | 0.040 | 0.172 | 0.036 | 0.051 | 0.081 | 0.025 |         |
| chr4:55619846-55619859   | Yes | 892  | 3  | 14  | rs11732442 | rs4353958  |            | 0.125 | 0.109 | 0.109 | 0.069 | 0.212 | 0.139 |         |
| chr4:55916001-55916063   |     | 317  | 0  | 63  | rs7664996  | rs7665169  |            | 0.164 | 0.000 | 0.201 | 0.177 | 0.149 | 0.172 | Balance |
| chr4:55977759-55977800   |     | 278  | 3  | 42  | rs3943404  | rs2034965  |            | 0.210 | 0.215 | 0.258 | 0.264 | 0.227 | 0.213 | Balance |
| chr4:55982752-55982784   | Yes | 651  | 1  | 33  | rs11133360 | rs34945396 |            | 0.044 | 0.204 | 0.194 | 0.144 | 0.190 | 0.041 |         |
| chr4:56026865-56026914   | Yes | 565  | 1  | 50  | rs4864958  | rs75371420 | rs34743464 | 0.216 | 0.200 | 0.284 | 0.180 | 0.453 | 0.238 |         |
| chr4:106196829-106196951 | Yes | 534  | 0  | 123 | rs34402524 | rs2454206  |            | 0.066 | 0.047 | 0.140 | 0.089 | 0.090 | 0.090 |         |
| chr4:143043340-143043404 |     | 351  | 0  | 65  | rs2270658  | rs13133767 |            | 0.016 | 0.075 | 0.082 | 0.105 | 0.089 | 0.057 | Balance |
| chr4:187534362-187534375 | Yes | 2353 | 0  | 14  | rs2249916  | rs2249917  |            | 0.195 | 0.281 | 0.110 | 0.189 | 0.084 | 0.197 |         |
| chr4:187629497-187629538 | Yes | 1727 | 0  | 42  | rs458021   | rs3733413  |            | 0.128 | 0.085 | 0.070 | 0.091 | 0.031 | 0.098 |         |
| chr5:231111-231143       | Yes | 2366 | 1  | 33  | rs1126417  | rs2288459  |            | 0.164 | 0.058 | 0.111 | 0.241 | 0.079 | 0.139 |         |
| chr5:256472-256509       |     | 1282 | 9  | 38  | rs6961     | rs6962     |            | 0.269 | 0.059 | 0.105 | 0.108 | 0.075 | 0.197 | MH>2    |
| chr5:35861068-35861159   | Yes | 351  | 3  | 92  | rs1494558  | rs11567705 | rs969128   | 0.328 | 0.191 | 0.413 | 0.349 | 0.239 | 0.443 |         |
| chr5:35871190-35871273   | Yes | 255  | 1  | 84  | rs1494555  | rs2228141  |            | 0.069 | 0.153 | 0.144 | 0.166 | 0.062 | 0.164 |         |
| chr5:56178111-56178217   | Yes | 473  | 0  | 107 | rs3822625  | rs832583   |            | 0.119 | 0.108 | 0.075 | 0.078 | 0.055 | 0.049 |         |
| chr5:57754808-57754851   |     | 359  | 2  | 44  | rs697133   | rs702722   |            | 0.230 | 0.105 | 0.104 | 0.069 | 0.098 | 0.205 | Balance |

|                          |     |      |    |     |            |            |            |       |       |       |       |       |       |         |
|--------------------------|-----|------|----|-----|------------|------------|------------|-------|-------|-------|-------|-------|-------|---------|
| chr5:67477132-67477234   | Yes | 371  | 0  | 103 | rs34721946 | rs34166422 | rs73126524 | 0.017 | 0.247 | 0.035 | 0.105 | 0.072 | 0.033 |         |
| chr5:67492589-67492652   | Yes | 677  | 2  | 64  | rs13188623 | rs58409263 |            | 0.105 | 0.293 | 0.121 | 0.180 | 0.118 | 0.130 |         |
| chr5:67517563-67517646   | Yes | 275  | 1  | 84  | rs6449959  | rs831227   |            | 0.243 | 0.018 | 0.187 | 0.161 | 0.100 | 0.303 |         |
| chr5:67522722-67522851   | Yes | 262  | 1  | 130 | rs706713   | rs706714   |            | 0.130 | 0.051 | 0.012 | 0.029 | 0.060 | 0.098 |         |
| chr5:67534039-67534057   | Yes | 887  | 0  | 19  | rs7709243  | rs10940158 | rs12652661 | 0.216 | 0.154 | 0.212 | 0.272 | 0.097 | 0.156 |         |
| chr5:67553771-67553827   | Yes | 584  | 1  | 57  | rs6893676  | rs34303    |            | 0.090 | 0.168 | 0.173 | 0.143 | 0.106 | 0.074 |         |
| chr5:79950497-79950512   |     | 1392 | 8  | 16  | rs2250063  | rs1105524  |            | 0.036 | 0.047 | 0.248 | 0.206 | 0.231 | 0.098 | MH>2    |
| chr5:149456772-149456811 | Yes | 1109 | 3  | 40  | rs60844779 | rs3829987  |            | 0.223 | 0.068 | 0.031 | 0.215 | 0.051 | 0.221 |         |
| chr5:176517326-176517461 |     | 652  | 3  | 136 | rs422421   | rs446382   |            | 0.169 | 0.000 | 0.078 | 0.040 | 0.033 | 0.148 | Balance |
| chr5:176523562-176523597 | Yes | 1990 | 0  | 36  | rs31777    | rs31776    |            | 0.137 | 0.000 | 0.076 | 0.038 | 0.033 | 0.115 |         |
| chr5:176531772-176531857 | Yes | 284  | 3  | 86  | rs7708357  | rs165943   |            | 0.168 | 0.046 | 0.242 | 0.248 | 0.183 | 0.197 |         |
| chr5:176539212-176539286 |     | 922  | 0  | 75  | rs244730   | rs351864   |            | 0.031 | 0.027 | 0.121 | 0.140 | 0.207 | 0.066 | Balance |
| chr5:176721198-176721272 |     | 1806 | 1  | 75  | rs28580074 | rs11740250 |            | 0.011 | 0.000 | 0.119 | 0.146 | 0.181 | 0.041 | Balance |
| chr5:180046209-180046344 |     | 765  | 12 | 136 | rs446003   | rs448012   |            | 0.100 | 0.057 | 0.083 | 0.075 | 0.135 | 0.098 | MH>2    |
| chr5:180051003-180051118 |     | 2483 | 2  | 116 | rs307826   | rs728986   |            | 0.015 | 0.000 | 0.037 | 0.055 | 0.044 | 0.016 | Balance |
| chr5:180057231-180057293 |     | 1518 | 0  | 63  | rs3736061  | rs34221241 |            | 0.000 | 0.000 | 0.081 | 0.033 | 0.041 | 0.016 | Balance |
| chr6:26056549-26056708   | Yes | 524  | 2  | 160 | rs10425    | rs2230653  | rs12204800 | 0.048 | 0.309 | 0.227 | 0.344 | 0.256 | 0.082 |         |
| chr6:30865115-30865204   | Yes | 461  | 5  | 90  | rs2239517  | rs2267641  |            | 0.120 | 0.244 | 0.038 | 0.063 | 0.094 | 0.098 |         |
| chr6:32188603-32188642   | Yes | 1185 | 1  | 40  | rs520803   | rs520692   | rs520688   | 0.000 | 0.047 | 0.000 | 0.000 | 0.011 | 0.000 |         |
| chr6:32190390-32190484   | Yes | 2363 | 5  | 95  | rs915894   | rs8192569  |            | 0.330 | 0.232 | 0.102 | 0.141 | 0.205 | 0.328 |         |
| chr6:41924853-41924931   | Yes | 922  | 2  | 79  | rs4623235  | rs16895130 |            | 0.095 | 0.110 | 0.210 | 0.156 | 0.138 | 0.107 |         |
| chr6:41941980-41941993   |     | 1079 | 1  | 14  | rs4415146  | rs72853828 |            | 0.000 | 0.089 | 0.221 | 0.125 | 0.132 | 0.049 | Balance |
| chr6:42013020-42013049   | Yes | 530  | 0  | 30  | rs9381126  | rs6919122  | rs6942118  | 0.351 | 0.421 | 0.381 | 0.504 | 0.390 | 0.254 |         |
| chr6:42039487-42039542   | Yes | 651  | 3  | 56  | rs9349215  | rs66472208 |            | 0.023 | 0.245 | 0.020 | 0.048 | 0.127 | 0.057 |         |
| chr6:42039551-42039666   | Yes | 292  | 1  | 116 | rs66489927 | rs7763360  | rs2492927  | 0.192 | 0.148 | 0.300 | 0.248 | 0.322 | 0.221 |         |

|                          |     |      |    |     |            |             |            |       |       |       |       |       |       |         |
|--------------------------|-----|------|----|-----|------------|-------------|------------|-------|-------|-------|-------|-------|-------|---------|
| chr6:42044204-42044273   |     | 717  | 1  | 70  | rs11968793 | rs9471750   |            | 0.184 | 0.057 | 0.046 | 0.045 | 0.014 | 0.221 | Balance |
| chr6:42052577-42052667   | Yes | 305  | 0  | 91  | rs9357387  | rs2493841   | rs9381136  | 0.050 | 0.163 | 0.176 | 0.161 | 0.139 | 0.123 |         |
| chr6:117725448-117725578 |     | 277  | 4  | 131 | rs1998206  | rs2243378   |            | 0.076 | 0.181 | 0.150 | 0.143 | 0.197 | 0.197 | Balance |
| chr6:152382311-152382325 |     | 279  | 2  | 15  | rs2273206  | rs2273207   |            | 0.137 | 0.039 | 0.026 | 0.039 | 0.055 | 0.066 | Balance |
| chr7:6026775-6026942     |     | 720  | 19 | 168 | rs2228006  | rs1805323   |            | 0.000 | 0.122 | 0.046 | 0.017 | 0.106 | 0.016 | MH>2    |
| chr7:6026942-6026988     | Yes | 3560 | 3  | 47  | rs1805323  | rs1805321   |            | 0.000 | 0.303 | 0.046 | 0.017 | 0.153 | 0.016 |         |
| chr7:55220177-55220202   | Yes | 1118 | 0  | 26  | rs11506105 | rs845561    |            | 0.115 | 0.265 | 0.254 | 0.304 | 0.413 | 0.148 |         |
| chr7:55236774-55236862   |     | 458  | 5  | 89  | rs845550   | rs1815156   |            | 0.096 | 0.000 | 0.114 | 0.062 | 0.042 | 0.123 | Balance |
| chr7:55251541-55251648   | Yes | 672  | 4  | 108 | rs2877261  | rs13222385  | rs11771471 | 0.200 | 0.076 | 0.233 | 0.183 | 0.090 | 0.189 |         |
| chr7:55306599-55306625   |     | 577  | 6  | 47  | rs2037700  | rs2037699   | rs2037698  | 0.368 | 0.083 | 0.104 | 0.124 | 0.045 | 0.271 | MH>2    |
| chr7:100410597-100410657 |     | 1469 | 8  | 61  | rs2230585  | rs770657085 |            | 0.164 | 0.056 | 0.000 | 0.043 | 0.156 | 0.197 | MH>2    |
| chr7:100416139-100416250 | Yes | 1438 | 3  | 112 | rs3857809  | rs144173    |            | 0.185 | 0.059 | 0.000 | 0.301 | 0.173 | 0.172 |         |
| chr7:116336880-116336947 | Yes | 666  | 1  | 68  | rs2237708  | rs39749     |            | 0.036 | 0.209 | 0.257 | 0.228 | 0.242 | 0.115 |         |
| chr7:116471122-116471227 | Yes | 297  | 4  | 106 | rs41773    | rs62470772  |            | 0.129 | 0.093 | 0.206 | 0.115 | 0.148 | 0.131 |         |
| chr7:116480433-116480524 |     | 319  | 7  | 92  | rs41777    | rs35099490  | rs41778    | 0.267 | 0.217 | 0.279 | 0.268 | 0.283 | 0.288 | MH>2    |
| chr8:30999122-30999123   | Yes | 554  | 3  | 2   | rs3024239  | rs2737335   |            | 0.149 | 0.024 | 0.060 | 0.032 | 0.085 | 0.246 |         |
| chr8:31024638-31024654   | Yes | 432  | 0  | 17  | rs1801196  | rs1346044   |            | 0.147 | 0.104 | 0.266 | 0.173 | 0.283 | 0.221 |         |
| chr8:38299624-38299715   | Yes | 1668 | 5  | 92  | rs60527016 | rs6987534   |            | 0.028 | 0.286 | 0.236 | 0.219 | 0.076 | 0.074 |         |
| chr8:38310910-38311001   | Yes | 1289 | 0  | 92  | rs10958700 | rs4733930   |            | 0.029 | 0.323 | 0.260 | 0.249 | 0.074 | 0.074 |         |
| chr8:38317398-38317476   |     | 1504 | 4  | 79  | rs7012413  | rs7388222   | rs3758101  | 0.213 | 0.088 | 0.076 | 0.225 | 0.115 | 0.205 | Balance |
| chr8:38350292-38350315   | Yes | 580  | 2  | 24  | rs35305468 | rs7830964   |            | 0.039 | 0.249 | 0.180 | 0.118 | 0.138 | 0.107 |         |
| chr8:38359468-38359529   |     | 1045 | 3  | 62  | rs7845393  | rs35804490  |            | 0.137 | 0.172 | 0.125 | 0.114 | 0.282 | 0.180 | LD      |
| chr8:38361379-38361430   | Yes | 1456 | 2  | 52  | rs328294   | rs328293    |            | 0.309 | 0.172 | 0.126 | 0.115 | 0.283 | 0.213 |         |
| chr8:128700175-128700233 | Yes | 496  | 2  | 59  | rs13282849 | rs7005394   |            | 0.208 | 0.179 | 0.063 | 0.084 | 0.201 | 0.287 |         |
| chr8:128713221-128713364 | Yes | 796  | 5  | 144 | rs28548827 | rs7820045   |            | 0.254 | 0.057 | 0.028 | 0.101 | 0.111 | 0.148 |         |

|                           |     |      |   |     |            |            |            |       |       |       |       |       |       |         |
|---------------------------|-----|------|---|-----|------------|------------|------------|-------|-------|-------|-------|-------|-------|---------|
| chr8:128718068-128718102  |     | 457  | 2 | 35  | rs9642880  | rs78635199 |            | 0.000 | 0.035 | 0.129 | 0.062 | 0.171 | 0.041 | Balance |
| chr8:128889285-128889371  | Yes | 1835 | 1 | 87  | rs6470587  | rs6470588  |            | 0.081 | 0.165 | 0.210 | 0.202 | 0.230 | 0.156 |         |
| chr8:145737636-145737816  | Yes | 485  | 0 | 181 | rs4925828  | rs4251691  |            | 0.000 | 0.203 | 0.000 | 0.072 | 0.000 | 0.000 |         |
| chr8:145741702-145741765  |     | 2058 | 6 | 64  | rs4244612  | rs4244613  |            | 0.081 | 0.027 | 0.108 | 0.094 | 0.129 | 0.148 | MH>2    |
| chr9:5408242-5408358      | Yes | 344  | 3 | 117 | rs10758685 | rs10975098 | rs10975099 | 0.084 | 0.349 | 0.257 | 0.320 | 0.409 | 0.205 |         |
| chr9:5415025-5415111      | Yes | 372  | 3 | 87  | rs78298180 | rs10758687 |            | 0.104 | 0.161 | 0.054 | 0.052 | 0.199 | 0.066 |         |
| chr9:5420254-5420266      | Yes | 1180 | 1 | 13  | rs10121219 | rs11790878 |            | 0.064 | 0.227 | 0.222 | 0.248 | 0.218 | 0.172 |         |
| chr9:5456523-5456587      |     | 277  | 1 | 65  | rs17742278 | rs7023227  | rs12002985 | 0.165 | 0.083 | 0.337 | 0.320 | 0.305 | 0.262 | Balance |
| chr9:5458035-5458095      | Yes | 323  | 3 | 61  | rs7042084  | rs10481593 |            | 0.268 | 0.132 | 0.220 | 0.249 | 0.131 | 0.205 |         |
| chr9:5484100-5484203      | Yes | 395  | 4 | 104 | rs11793113 | rs11790610 | rs10122509 | 0.139 | 0.151 | 0.094 | 0.084 | 0.167 | 0.156 |         |
| chr9:5505508-5505583      |     | 262  | 5 | 76  | rs7025653  | rs59338043 | rs6476984  | 0.228 | 0.188 | 0.234 | 0.298 | 0.215 | 0.205 | Balance |
| chr9:5514839-5514919      |     | 561  | 7 | 81  | rs2381282  | rs56381807 |            | 0.275 | 0.204 | 0.128 | 0.203 | 0.190 | 0.303 | MH>2    |
| chr9:87478135-87478172    | Yes | 1016 | 4 | 38  | rs7048015  | rs10780690 |            | 0.023 | 0.251 | 0.184 | 0.258 | 0.216 | 0.139 |         |
| chr9:93641175-93641199    |     | 693  | 2 | 25  | rs2306041  | rs2306040  |            | 0.062 | 0.000 | 0.064 | 0.058 | 0.020 | 0.066 | Balance |
| chr9:98238358-98238379    | Yes | 3840 | 0 | 22  | rs2066836  | rs1805155  |            | 0.011 | 0.083 | 0.109 | 0.076 | 0.060 | 0.074 |         |
| chr9:139401504-139401577  | Yes | 1346 | 1 | 74  | rs3124596  | rs7870145  | rs3829116  | 0.310 | 0.000 | 0.163 | 0.117 | 0.264 | 0.238 |         |
| chr9:139403268-139403280  |     | 500  | 1 | 13  | rs3125000  | rs11145765 |            | 0.046 | 0.000 | 0.095 | 0.059 | 0.238 | 0.025 | Balance |
| chr9:139405093-139405261  | Yes | 626  | 3 | 169 | rs36119806 | rs3125001  |            | 0.150 | 0.012 | 0.102 | 0.065 | 0.184 | 0.156 |         |
| chr9:139410424-139410589  | Yes | 327  | 2 | 166 | rs3125006  | rs4880099  |            | 0.088 | 0.052 | 0.115 | 0.068 | 0.215 | 0.049 |         |
| chr9:139411714-139411880  |     | 428  | 5 | 167 | rs11145767 | rs9411254  |            | 0.209 | 0.000 | 0.000 | 0.025 | 0.000 | 0.213 | Balance |
| chr10:43611708-43611865   | Yes | 629  | 2 | 158 | rs741968   | rs2256550  |            | 0.060 | 0.218 | 0.161 | 0.212 | 0.284 | 0.139 |         |
| chr10:43615505-43615633   | Yes | 463  | 5 | 129 | rs2472737  | rs1800863  |            | 0.105 | 0.121 | 0.193 | 0.187 | 0.160 | 0.115 |         |
| chr10:70332580-70332672   | Yes | 549  | 1 | 93  | rs10823229 | rs12773594 |            | 0.023 | 0.173 | 0.185 | 0.151 | 0.271 | 0.090 |         |
| chr10:104386934-104387019 | Yes | 250  | 0 | 86  | rs17114803 | rs12414407 |            | 0.224 | 0.250 | 0.093 | 0.238 | 0.240 | 0.197 |         |
| chr10:123194558-123194609 | Yes | 384  | 0 | 52  | rs7911440  | rs6585731  |            | 0.051 | 0.211 | 0.242 | 0.082 | 0.243 | 0.107 |         |



|                           |     |      |    |     |            |            |            |       |       |       |       |       |       |          |
|---------------------------|-----|------|----|-----|------------|------------|------------|-------|-------|-------|-------|-------|-------|----------|
| chr10:123199092-123199095 | Yes | 1151 | 2  | 4   | rs4752560  | rs2114689  |            | 0.283 | 0.023 | 0.075 | 0.156 | 0.160 | 0.131 |          |
| chr10:123242724-123242780 |     | 415  | 2  | 57  | rs3135811  | rs3135810  |            | 0.154 | 0.000 | 0.064 | 0.030 | 0.000 | 0.148 | Balance  |
| chr10:123275662-123275666 | Yes | 320  | 1  | 5   | rs2912761  | rs2981453  |            | 0.211 | 0.000 | 0.000 | 0.050 | 0.000 | 0.197 |          |
| chr10:123335839-123335866 | Yes | 1055 | 1  | 28  | rs45631611 | rs10886946 |            | 0.017 | 0.113 | 0.071 | 0.055 | 0.114 | 0.041 |          |
| chr10:123346116-123346190 | Yes | 420  | 0  | 75  | rs2981575  | rs1219648  |            | 0.195 | 0.048 | 0.000 | 0.022 | 0.013 | 0.090 |          |
| chr10:123396636-123396715 |     | 259  | 5  | 80  | rs10788193 | rs2454809  |            | 0.059 | 0.176 | 0.195 | 0.192 | 0.246 | 0.139 | Coverage |
| chr10:123396728-123396806 | Yes | 331  | 2  | 79  | rs1909670  | rs1614303  |            | 0.029 | 0.176 | 0.100 | 0.131 | 0.073 | 0.057 |          |
| chr10:123406645-123406663 | Yes | 699  | 4  | 19  | rs10788194 | rs7923788  |            | 0.084 | 0.227 | 0.151 | 0.192 | 0.125 | 0.139 |          |
| chr11:534197-534242       | Yes | 2026 | 1  | 46  | rs41258054 | rs12628    |            | 0.000 | 0.153 | 0.056 | 0.137 | 0.076 | 0.025 |          |
| chr11:8246326-8246343     |     | 287  | 6  | 18  | rs34544683 | rs3816490  |            | 0.022 | 0.098 | 0.125 | 0.219 | 0.133 | 0.123 | MH>2     |
| chr11:69412090-69412124   | Yes | 2968 | 1  | 35  | rs79274134 | rs7112989  |            | 0.254 | 0.232 | 0.000 | 0.127 | 0.031 | 0.254 |          |
| chr11:69446719-69446766   |     | 1480 | 2  | 48  | rs609581   | rs11826558 |            | 0.070 | 0.015 | 0.058 | 0.079 | 0.187 | 0.139 | Balance  |
| chr11:69448373-69448445   |     | 563  | 7  | 73  | rs654240   | rs654648   |            | 0.188 | 0.029 | 0.136 | 0.112 | 0.210 | 0.221 | MH>2     |
| chr11:69508082-69508159   |     | 574  | 3  | 78  | rs7930020  | rs10908198 |            | 0.000 | 0.041 | 0.125 | 0.267 | 0.045 | 0.066 | Balance  |
| chr12:4333159-4333203     |     | 1194 | 4  | 45  | rs7955734  | rs7970219  | rs7954847  | 0.268 | 0.092 | 0.026 | 0.085 | 0.100 | 0.229 | Balance  |
| chr12:4346169-4346177     | Yes | 646  | 0  | 9   | rs11063052 | rs11832328 |            | 0.318 | 0.079 | 0.038 | 0.072 | 0.080 | 0.213 |          |
| chr12:4351884-4352027     | Yes | 468  | 5  | 144 | rs7955545  | rs4766223  |            | 0.051 | 0.113 | 0.033 | 0.076 | 0.092 | 0.139 |          |
| chr12:4376089-4376091     | Yes | 306  | 2  | 3   | rs4238013  | rs12818766 |            | 0.119 | 0.033 | 0.181 | 0.161 | 0.147 | 0.139 |          |
| chr12:4399036-4399054     | Yes | 1619 | 2  | 52  | rs3217859  | rs3217860  | rs3217861  | 0.325 | 0.391 | 0.414 | 0.491 | 0.479 | 0.303 |          |
| chr12:4399917-4399970     | Yes | 892  | 2  | 54  | rs3217867  | rs3217868  | rs3217869  | 0.173 | 0.041 | 0.220 | 0.133 | 0.188 | 0.213 |          |
| chr12:4411639-4411683     | Yes | 1376 | 1  | 45  | rs3217925  | rs3217926  |            | 0.127 | 0.068 | 0.253 | 0.172 | 0.227 | 0.188 |          |
| chr12:4417127-4417232     | Yes | 1224 | 1  | 106 | rs7133323  | rs9668504  |            | 0.449 | 0.324 | 0.237 | 0.282 | 0.142 | 0.418 |          |
| chr12:4463020-4463036     |     | 850  | 31 | 17  | rs7297048  | rs7296130  | rs12823973 | 0.115 | 0.089 | 0.193 | 0.303 | 0.117 | 0.131 | MH>2     |
| chr12:12009741-12009874   | Yes | 379  | 2  | 134 | rs2238126  | rs743614   |            | 0.181 | 0.240 | 0.190 | 0.249 | 0.079 | 0.180 |          |
| chr12:12013572-12013612   | Yes | 647  | 3  | 41  | rs2855708  | rs6488463  |            | 0.232 | 0.196 | 0.211 | 0.347 | 0.146 | 0.262 |          |

|                           |     |      |   |     |            |            |           |       |       |       |       |       |       |         |
|---------------------------|-----|------|---|-----|------------|------------|-----------|-------|-------|-------|-------|-------|-------|---------|
| chr12:12016008-12016089   | Yes | 1488 | 3 | 82  | rs2238130  | rs2416944  | rs2238131 | 0.125 | 0.248 | 0.144 | 0.216 | 0.104 | 0.197 |         |
| chr12:12020114-12020170   | Yes | 637  | 1 | 57  | rs2723805  | rs7973930  |           | 0.241 | 0.111 | 0.075 | 0.066 | 0.054 | 0.238 |         |
| chr12:12033536-12033570   |     | 2184 | 4 | 35  | rs11832110 | rs4763730  |           | 0.232 | 0.000 | 0.042 | 0.074 | 0.000 | 0.189 | Balance |
| chr12:12035649-12035664   | Yes | 2052 | 1 | 16  | rs2710310  | rs2739085  |           | 0.126 | 0.271 | 0.194 | 0.251 | 0.159 | 0.180 |         |
| chr12:18656174-18656225   |     | 381  | 1 | 52  | rs11044141 | rs11044142 |           | 0.099 | 0.000 | 0.000 | 0.000 | 0.000 | 0.041 | Balance |
| chr12:56494991-56494998   |     | 3387 | 6 | 8   | rs2271189  | rs773123   |           | 0.073 | 0.000 | 0.110 | 0.066 | 0.070 | 0.066 | MH>2    |
| chr12:69169222-69169316   | Yes | 404  | 3 | 95  | rs6581833  | rs73334654 |           | 0.256 | 0.016 | 0.059 | 0.078 | 0.000 | 0.328 |         |
| chr12:69265196-69265278   | Yes | 768  | 0 | 83  | rs3817605  | rs2293637  |           | 0.310 | 0.192 | 0.022 | 0.111 | 0.106 | 0.271 |         |
| chr12:69277127-69277165   | Yes | 773  | 1 | 39  | rs10878875 | rs1663588  |           | 0.126 | 0.162 | 0.124 | 0.133 | 0.215 | 0.180 |         |
| chr12:121416622-121416650 | Yes | 3076 | 2 | 29  | rs1169289  | rs1169288  |           | 0.082 | 0.049 | 0.132 | 0.112 | 0.151 | 0.131 |         |
| chr12:121431272-121431300 | Yes | 1774 | 0 | 29  | rs2071190  | rs1169301  |           | 0.118 | 0.255 | 0.236 | 0.272 | 0.182 | 0.189 |         |
| chr12:121435427-121435475 |     | 3503 | 1 | 49  | rs2464196  | rs2464195  |           | 0.014 | 0.000 | 0.062 | 0.046 | 0.092 | 0.049 | Balance |
| chr12:121437114-121437221 |     | 1919 | 0 | 108 | rs55834942 | rs1169304  |           | 0.012 | 0.000 | 0.166 | 0.082 | 0.023 | 0.025 | Balance |
| chr12:133208886-133208979 | Yes | 739  | 2 | 94  | rs5745023  | rs5745022  |           | 0.173 | 0.105 | 0.135 | 0.219 | 0.049 | 0.180 |         |
| chr12:133226159-133226196 | Yes | 587  | 2 | 38  | rs4883613  | rs4883537  |           | 0.105 | 0.107 | 0.135 | 0.222 | 0.050 | 0.180 |         |
| chr12:133253995-133254083 | Yes | 448  | 1 | 89  | rs5744751  | rs5744750  |           | 0.000 | 0.105 | 0.100 | 0.045 | 0.042 | 0.025 |         |
| chr13:21562832-21562948   |     | 1715 | 3 | 117 | rs2770928  | rs558614   |           | 0.175 | 0.000 | 0.080 | 0.087 | 0.153 | 0.156 | Balance |
| chr13:32854998-32855018   |     | 333  | 1 | 21  | rs17692070 | rs11617975 |           | 0.129 | 0.000 | 0.098 | 0.128 | 0.122 | 0.123 | Balance |
| chr13:32986219-32986340   | Yes | 313  | 0 | 122 | rs206319   | rs206320   | rs615762  | 0.107 | 0.204 | 0.175 | 0.244 | 0.262 | 0.107 |         |
| chr14:35872792-35872926   |     | 643  | 1 | 135 | rs2233415  | rs1050851  |           | 0.020 | 0.019 | 0.213 | 0.130 | 0.146 | 0.033 | Balance |
| chr14:102568296-102568367 |     | 969  | 0 | 72  | rs10873531 | rs8005905  |           | 0.278 | 0.049 | 0.017 | 0.068 | 0.123 | 0.303 | Balance |
| chr14:104165753-104165927 |     | 765  | 4 | 175 | rs861539   | rs1799796  |           | 0.114 | 0.073 | 0.295 | 0.229 | 0.189 | 0.115 | Balance |
| chr14:105239146-105239192 | Yes | 521  | 5 | 47  | rs3803304  | rs2494732  |           | 0.169 | 0.097 | 0.171 | 0.290 | 0.302 | 0.230 |         |
| chr14:105258892-105258893 | Yes | 737  | 1 | 2   | rs2494748  | rs2494749  |           | 0.120 | 0.122 | 0.092 | 0.231 | 0.245 | 0.123 |         |
| chr15:41857216-41857303   |     | 1528 | 2 | 88  | rs11639399 | rs2277536  |           | 0.096 | 0.012 | 0.308 | 0.172 | 0.236 | 0.139 | Balance |

|                         |     |      |    |     |            |            |  |       |       |       |       |       |       |         |
|-------------------------|-----|------|----|-----|------------|------------|--|-------|-------|-------|-------|-------|-------|---------|
| chr15:41860411-41860490 |     | 860  | 2  | 80  | rs7171675  | rs12148316 |  | 0.095 | 0.011 | 0.134 | 0.131 | 0.110 | 0.139 | Balance |
| chr15:67457335-67457485 | Yes | 475  | 4  | 151 | rs1065080  | rs2289261  |  | 0.133 | 0.238 | 0.139 | 0.087 | 0.220 | 0.156 |         |
| chr15:73996066-73996101 |     | 3299 | 3  | 36  | rs11574483 | rs10083681 |  | 0.147 | 0.000 | 0.000 | 0.017 | 0.000 | 0.148 | Balance |
| chr15:88488326-88488428 | Yes | 1800 | 1  | 103 | rs8042993  | rs1369426  |  | 0.088 | 0.135 | 0.153 | 0.097 | 0.261 | 0.066 |         |
| chr15:88549118-88549151 | Yes | 1763 | 0  | 34  | rs11073758 | rs12324332 |  | 0.266 | 0.015 | 0.124 | 0.133 | 0.079 | 0.303 |         |
| chr15:88554878-88554886 |     | 2501 | 3  | 9   | rs4989257  | rs898707   |  | 0.040 | 0.014 | 0.124 | 0.128 | 0.082 | 0.164 | Balance |
| chr15:88646922-88647038 | Yes | 975  | 1  | 117 | rs16941255 | rs76506232 |  | 0.110 | 0.132 | 0.000 | 0.010 | 0.000 | 0.115 |         |
| chr15:88667852-88667948 | Yes | 1099 | 0  | 97  | rs3784411  | rs3784410  |  | 0.192 | 0.100 | 0.217 | 0.225 | 0.151 | 0.172 |         |
| chr16:2138218-2138269   |     | 1617 | 14 | 52  | rs1800718  | rs1748     |  | 0.136 | 0.000 | 0.090 | 0.063 | 0.024 | 0.074 | MH>2    |
| chr16:2138269-2138398   |     | 941  | 4  | 130 | rs1748     | rs13332221 |  | 0.249 | 0.000 | 0.116 | 0.017 | 0.123 | 0.197 | Balance |
| chr16:2138398-2138422   | Yes | 2026 | 0  | 25  | rs13332221 | rs13332222 |  | 0.118 | 0.000 | 0.000 | 0.013 | 0.000 | 0.090 |         |
| chr16:81819768-81819820 | Yes | 2558 | 1  | 53  | rs1143685  | rs4294811  |  | 0.140 | 0.141 | 0.282 | 0.271 | 0.126 | 0.148 |         |
| chr16:89806343-89806347 | Yes | 601  | 2  | 5   | rs11647746 | rs7195906  |  | 0.161 | 0.013 | 0.074 | 0.035 | 0.134 | 0.156 |         |
| chr16:89849480-89849629 |     | 275  | 2  | 150 | rs2239359  | rs12448860 |  | 0.032 | 0.013 | 0.064 | 0.370 | 0.352 | 0.319 | Balance |
| chr16:89858505-89858525 |     | 698  | 3  | 21  | rs6500452  | rs1800287  |  | 0.177 | 0.012 | 0.073 | 0.043 | 0.133 | 0.221 | Balance |
| chr17:1782952-1782957   | Yes | 1284 | 1  | 6   | rs5030755  | rs2230930  |  | 0.000 | 0.000 | 0.102 | 0.020 | 0.024 | 0.016 |         |
| chr17:37807698-37807707 |     | 1082 | 2  | 10  | rs9972882  | rs75397452 |  | 0.141 | 0.000 | 0.047 | 0.042 | 0.000 | 0.131 | Balance |
| chr17:37832279-37832315 | Yes | 1408 | 1  | 37  | rs1495100  | rs2934953  |  | 0.194 | 0.000 | 0.016 | 0.062 | 0.053 | 0.188 |         |
| chr17:37833562-37833567 |     | 2351 | 2  | 6   | rs11656146 | rs907088   |  | 0.000 | 0.000 | 0.092 | 0.030 | 0.011 | 0.016 | Balance |
| chr17:37834357-37834367 |     | 666  | 0  | 11  | rs732084   | rs732083   |  | 0.181 | 0.000 | 0.000 | 0.043 | 0.011 | 0.156 | Balance |
| chr17:37834715-37834808 | Yes | 1558 | 5  | 94  | rs12150603 | rs72832915 |  | 0.042 | 0.153 | 0.308 | 0.196 | 0.235 | 0.131 |         |
| chr17:37853048-37853097 |     | 1655 | 1  | 50  | rs2643194  | rs2517951  |  | 0.188 | 0.000 | 0.017 | 0.085 | 0.081 | 0.303 | Balance |
| chr17:37893458-37893484 |     | 499  | 8  | 27  | rs67597968 | rs4795393  |  | 0.209 | 0.000 | 0.053 | 0.069 | 0.098 | 0.221 | MH>2    |
| chr17:41616392-41616456 | Yes | 1646 | 1  | 65  | rs76280498 | rs7222604  |  | 0.000 | 0.150 | 0.106 | 0.110 | 0.181 | 0.033 |         |
| chr17:78820329-78820374 | Yes | 3252 | 0  | 46  | rs3751945  | rs2589156  |  | 0.082 | 0.000 | 0.107 | 0.078 | 0.115 | 0.066 |         |

|                         |     |      |    |     |             |             |           |       |       |       |       |       |       |         |
|-------------------------|-----|------|----|-----|-------------|-------------|-----------|-------|-------|-------|-------|-------|-------|---------|
| chr17:78865546-78865630 | Yes | 631  | 3  | 85  | rs2289764   | rs2289765   |           | 0.289 | 0.044 | 0.111 | 0.110 | 0.115 | 0.303 |         |
| chr17:78896488-78896529 | Yes | 2726 | 4  | 42  | rs2271602   | rs2271603   |           | 0.154 | 0.196 | 0.321 | 0.291 | 0.307 | 0.197 |         |
| chr17:78897547-78897561 | Yes | 1725 | 0  | 15  | rs7217786   | rs6565491   |           | 0.031 | 0.199 | 0.122 | 0.111 | 0.249 | 0.049 |         |
| chr17:78921117-78921211 | Yes | 1576 | 2  | 95  | rs4969231   | rs9912373   |           | 0.022 | 0.079 | 0.124 | 0.114 | 0.060 | 0.082 |         |
| chr19:2226676-2226772   | Yes | 2349 | 1  | 97  | rs3815308   | rs2302061   |           | 0.034 | 0.182 | 0.143 | 0.172 | 0.203 | 0.090 |         |
| chr19:3110349-3110361   |     | 2345 | 5  | 13  | rs11085000  | rs41276846  |           | 0.018 | 0.193 | 0.112 | 0.063 | 0.188 | 0.016 |         |
| chr19:3119184-3119239   | Yes | 1438 | 1  | 56  | rs308046    | rs4900      |           | 0.166 | 0.233 | 0.135 | 0.101 | 0.275 | 0.271 |         |
| chr19:3119405-3119406   |     | 884  | 33 | 2   | rs370286    | rs451778    |           | 0.000 | 0.233 | 0.135 | 0.087 | 0.280 | 0.025 | MH>2    |
| chr19:5210622-5210782   |     | 740  | 2  | 161 | rs2302224   | rs1143698   |           | 0.166 | 0.066 | 0.126 | 0.134 | 0.090 | 0.131 | Balance |
| chr19:5210762-5210782   |     | 4185 | 0  | 21  | rs1143699   | rs1143698   |           | 0.222 | 0.000 | 0.099 | 0.081 | 0.056 | 0.205 | Balance |
| chr19:5212380-5212482   |     | 1945 | 1  | 103 | rs1064300   | rs2230611   |           | 0.115 | 0.000 | 0.124 | 0.135 | 0.126 | 0.098 | Balance |
| chr19:7163154-7163230   | Yes | 810  | 2  | 77  | rs2963      | rs2245648   |           | 0.186 | 0.025 | 0.065 | 0.068 | 0.141 | 0.148 |         |
| chr19:7166376-7166388   | Yes | 1028 | 2  | 13  | rs2059806   | rs2229429   |           | 0.179 | 0.065 | 0.191 | 0.144 | 0.262 | 0.197 |         |
| chr19:10267011-10267077 | Yes | 265  | 0  | 67  | rs4804490   | rs2228611   |           | 0.171 | 0.281 | 0.068 | 0.184 | 0.224 | 0.172 |         |
| chr19:17937758-17937786 |     | 1721 | 0  | 29  | rs3212798   | rs3212797   |           | 0.074 | 0.000 | 0.052 | 0.033 | 0.012 | 0.066 | Balance |
| chr19:17955001-17955021 | Yes | 1946 | 1  | 21  | rs3212713   | rs3212712   | rs3212711 | 0.197 | 0.000 | 0.000 | 0.022 | 0.000 | 0.139 |         |
| chr19:30253901-30253998 | Yes | 768  | 2  | 98  | rs117342492 | rs4805475   |           | 0.000 | 0.221 | 0.000 | 0.104 | 0.073 | 0.033 |         |
| chr19:30255068-30255090 | Yes | 495  | 2  | 23  | rs8103966   | rs8099838   |           | 0.043 | 0.310 | 0.250 | 0.232 | 0.252 | 0.082 |         |
| chr19:30290349-30290357 | Yes | 2732 | 1  | 9   | rs1473201   | rs111640872 |           | 0.085 | 0.106 | 0.247 | 0.180 | 0.213 | 0.066 |         |
| chr19:30319892-30319896 |     | 284  | 5  | 5   | rs56285422  | rs8106054   |           | 0.085 | 0.106 | 0.248 | 0.180 | 0.213 | 0.066 | LD      |
| chr19:30340381-30340412 | Yes | 593  | 3  | 32  | rs929813    | rs929814    |           | 0.216 | 0.087 | 0.121 | 0.293 | 0.263 | 0.271 |         |
| chr19:30361995-30362112 | Yes | 290  | 2  | 118 | rs255270    | rs255271    |           | 0.184 | 0.104 | 0.037 | 0.068 | 0.012 | 0.271 |         |
| chr19:41724820-41724885 | Yes | 2049 | 0  | 66  | rs2301236   | rs28364580  |           | 0.094 | 0.179 | 0.224 | 0.148 | 0.275 | 0.172 |         |
| chr19:41781493-41781579 | Yes | 1040 | 2  | 87  | rs8103839   | rs9304592   |           | 0.067 | 0.073 | 0.000 | 0.066 | 0.064 | 0.066 |         |
| chr19:50919797-50919828 | Yes | 2886 | 5  | 32  | rs3218776   | rs3218760   |           | 0.125 | 0.139 | 0.075 | 0.148 | 0.275 | 0.156 |         |

|                         |     |      |     |      |            |            |  |       |       |       |       |       |       |      |
|-------------------------|-----|------|-----|------|------------|------------|--|-------|-------|-------|-------|-------|-------|------|
| chr20:9543622-9543681   | Yes | 813  | 5   | 60   | rs2297345  | rs2297346  |  | 0.122 | 0.214 | 0.088 | 0.174 | 0.059 | 0.139 |      |
| chr20:30729488-30729523 | Yes | 3150 | 2   | 36   | rs6089193  | rs6089194  |  | 0.206 | 0.085 | 0.026 | 0.137 | 0.053 | 0.189 |      |
| chr20:40714479-40714540 | Yes | 1095 | 1   | 62   | rs2016647  | rs1569548  |  | 0.114 | 0.074 | 0.242 | 0.167 | 0.138 | 0.066 |      |
| chr20:40714539-40714540 |     | 1134 | 12  | 2    | rs1569547  | rs1569548  |  | 0.000 | 0.073 | 0.231 | 0.150 | 0.120 | 0.016 | MH>2 |
| chr20:57478807-57478939 |     | 711  | 8   | 133  | rs7121     | rs3730168  |  | 0.186 | 0.091 | 0.286 | 0.120 | 0.169 | 0.205 | MH>2 |
| chr21:42845374-42845383 | Yes | 6069 | 0   | 10   | rs2298659  | rs17854725 |  | 0.173 | 0.115 | 0.230 | 0.218 | 0.189 | 0.220 |      |
| chr21:42876400-42876447 | Yes | 2128 | 0   | 48   | rs7277080  | rs395584   |  | 0.287 | 0.017 | 0.019 | 0.235 | 0.212 | 0.229 |      |
| chr21:45643008-45643052 |     | 288  | 31  | 45   | rs1048710  | rs2298564  |  | 0.069 | 0.237 | 0.045 | 0.140 | 0.043 | 0.066 | MH>2 |
| chr22:17640022-17640045 | Yes | 1258 | 0   | 24   | rs11550530 | rs7287672  |  | 0.125 | 0.035 | 0.086 | 0.130 | 0.058 | 0.066 |      |
| chr22:21337266-21337325 | Yes | 565  | 4   | 60   | rs178280   | rs13054014 |  | 0.116 | 0.200 | 0.259 | 0.223 | 0.234 | 0.189 |      |
| chr22:21348914-21349037 |     | 1246 | 25  | 124  | rs4822790  | rs178292   |  | 0.105 | 0.224 | 0.135 | 0.112 | 0.142 | 0.139 | MH>2 |
| chr22:24158895-24158899 | Yes | 713  | 2   | 5    | rs9608192  | rs2070457  |  | 0.098 | 0.059 | 0.115 | 0.071 | 0.153 | 0.090 |      |
| chr22:29690246-29690345 | Yes | 259  | 0   | 100  | rs73156524 | rs131189   |  | 0.032 | 0.281 | 0.086 | 0.053 | 0.034 | 0.090 |      |
| Final Panel             |     | 164  | 768 | 1.78 | 59         |            |  | 0.139 | 0.139 | 0.139 | 0.156 | 0.153 | 0.155 |      |

571  
572

573 Supplementary Table 2

|                               |     | Threshold Median 3rd MH Frequency |     |     |     |     |
|-------------------------------|-----|-----------------------------------|-----|-----|-----|-----|
|                               |     | 0.5                               | 1   | 1.5 | 2   | 2.5 |
| In silico<br>Mixing<br>Levels | 0.5 | 40                                | 0   | 0   | 0   | 0   |
|                               | 1   | 100                               | 0   | 0   | 0   | 0   |
|                               | 1.5 | 100                               | 7   | 0   | 0   | 0   |
|                               | 2   | 100                               | 63  | 0   | 0   | 0   |
|                               | 2.5 | 100                               | 100 | 2   | 0   | 0   |
|                               | 3   | 100                               | 100 | 35  | 0   | 0   |
|                               | 4   | 100                               | 100 | 95  | 15  | 0   |
|                               | 5   | 100                               | 100 | 100 | 88  | 7   |
|                               | 10  | 100                               | 100 | 100 | 100 | 100 |

574
